# Supplementary material
Source: PubMed Central journal article supplement (PMC6777268)
Supplement: jama-322-1261-s001.pdf [file jama-322-1261-s001.pdf]

**CITRIS-ALI**

**Protocol Version 9**

Protocol Changes (Versions 2 – 9)

- **Version 2 Changes:** May, 2014 — Small edits made to the protocol including the removal of Venous Blood Gases for research, other small changes. Consent changed to reflect that blood specimens would be saved for a repository. A DSMB memo is was also submitted. Included the phrase: no evidence of left atrial hypertension in inclusion criteria.
- **Version 3 Changes:** May, 2014 — Minor changes made to the ventilator weaning and fluid management protocol.
- **Version 4 Changes:** July, 2014 — The title of the study was changed from “sepsis-induced ARDS” to “sepsis-associated ARDS,” and these changes were made throughout the protocol and consent. Body mass index over 40 was removed as part of the exclusion criteria.
- **Version 5 Changes:** November, 2014 — DSMB report submitted. Changes made to the protocol regarding specimen and data time points for clarification. Changes made to the inclusion exclusion criteria based on the suggestion of the DSMB and investigators. Changes were made to more clearly define patient population. More than seven days since starting mechanical ventilation removed from exclusion criteria. This is due to the fact that a patient can have new onset of ARDS not related to their time spent on a ventilator. With this amendment, now allowing for up to 2 liters of home oxygen therapy. This allows capture of patients with chronic obstructive lung disease. Still excluding interstitial lung disease (ILD) patients. ILD patients not on a ventilator added to exclusion criteria. Was in the exclusion criteria; however, now more visible now for clinical coordinators. Other minor changes. None of the changes affect safety or risk; nor do they require a change to the consent form.
- **Version 6 Changes:** March 2015 — Amendment served as our solution for monitoring blood glucose at the bedside. We made additional edits to the exclusion criteria. Excluding patients with no indwelling venous or arterial catheter in patients that require insulin in a manner that requires glucose being checked more than twice daily (e.g. continuous infusion, sliding scale). Updated the risk section in the consent form and protocol to reflect the risks associated with our modified glucose monitoring plan. Made minor administrative changes to the protocol.
- **Version 7 Changes:** December, 2015 — Administrative changes for clarity. Clarification that no bedside glucometer can be used for glucose monitoring while patients are in the CITRIS-ALI trial. Clarification on additional blood draw totals for glucose monitoring made.
- **Version 8 Changes:** July, 2016 — Dropped an enrollment site due to poor patient enrollment.
- **Version 9 Changes:** February, 2017 — Small administrative changes.
- The projected sample size for this study (n =170) should provide adequate power to detect an absolute 2 point difference on the average SOFA scores between the two study groups (13 vs. 11) with an average SD of 4.6. This will

53  
54  
55

provide an alpha level of 0.05 and a power of 80%.

| <b>Name</b>                                    | <b>Role</b>                       | <b>Email</b>                    | <b>Voice/Pager</b>                                |                   |
|------------------------------------------------|-----------------------------------|---------------------------------|---------------------------------------------------|-------------------|
| <b>Alpha Fowler, III, MD</b>                   | Investigator                      | alpha.fowler@vcuhealth.org      | 804.519.4369                                      | (c)               |
| <b>Jonathon D. Truwit, MD</b>                  | Investigator                      | Jonathon.truwit@froedtert.com   | 434.982.3500.4004<br>434-243-7088<br>434.227.1663 | (p)<br>(o)<br>(c) |
| <b>R. Duncan Hite, MD</b>                      | Investigator                      | hited@ccf.org                   | 216.445.3098<br>216.386.2099                      | (o)<br>(c)        |
| <b>Chris DeWilde, MSN, RN,<br/>CCRC, TCN-A</b> | Lead<br>Research<br>Coordinator   | christine.dewilde@vcuhealth.org | 804.628.5710<br>804.519.0022                      | (o)<br>(c)        |
| <b>Anna Priday</b>                             | Lead<br>Regulatory<br>Coordinator | anna.priday@vcuhealth.org       | 804.628.9612<br>804.221.9258                      | (o)<br>(c)        |

56  
57  
58  
59

60 **ABBREVIATIONS** .....6

61 **DEFINITIONS** .....7

62 **1. BACKGROUND** .....12

63 **1.1. Introduction** .....12

64 **1.2. Preliminary Progress – Vitamin C Intervention in Experimental Septic Lung Injury** .....14

65 **1.3 Phase I Human Trial: Vitamin C Infusion In Human Sepsis: Preliminary Results From A Safety Trial**

66 .....16

67 **1.4. Potential Mechanisms of Action of Ascorbic Acid in Sepsis** .....18

68 **1.5. Ascorbic Acid Dose Selection** .....18

69 **1.6. Study Rationale** .....19

70 **2. OBJECTIVES** .....19

71 **2.1. Primary Objectives** .....19

72 **2.2. Hypothesis** .....20

73 **3. END-POINTS** .....20

74 **3.1. Primary Endpoints** .....20

75 **3.2. Secondary End Points** .....20

76 **3.3. Focused Safety Analysis:** .....21

77     3.3.1 Renal Monitoring Plan .....21

78     3.3.2 Glucose Monitoring Plan .....21

79 **4. STUDY POPULATION AND ENROLLMENT** .....22

80 **4.1. Number/Source/Screening** .....22

81 **4.2. Inclusion Criteria** .....22

82     4.2.1 CITRIS-ALI Inclusion Criteria: .....22

83 **4.3. Enrollment, Randomization, and Study Initiation Time Window** .....23

84 **4.4. Informed Consent** .....23

85 **4.5. Randomization** .....24

|     |                                                              |           |
|-----|--------------------------------------------------------------|-----------|
| 86  | <b>4.7. Minorities and Women .....</b>                       | <b>24</b> |
| 87  | <b>5. STUDY PROCEDURES .....</b>                             | <b>24</b> |
| 88  | <b>5.1. Vitamin C or Placebo Administration.....</b>         | <b>24</b> |
| 89  | <b>5.2. Drug Level Specimens (venous blood).....</b>         | <b>25</b> |
| 90  | <b>5.3. Completion of Study Drug Administration .....</b>    | <b>25</b> |
| 91  | <b>5.4. Premature Withdrawal from Treatment .....</b>        | <b>25</b> |
| 92  | <b>5.5. Ventilator Procedures.....</b>                       | <b>26</b> |
| 93  | <b>5.6. On-Study Fluid Management .....</b>                  | <b>26</b> |
| 94  | <b>6. DATA COLLECTION .....</b>                              | <b>26</b> |
| 95  | <b>6.1. Background Assessments.....</b>                      | <b>26</b> |
| 96  | <b>6.2. Baseline/Hour 0 Assessments and Procedures .....</b> | <b>27</b> |
| 97  | <b>6.3. Assessments after Enrollment.....</b>                | <b>27</b> |
| 98  | <b>7. STATISTICAL CONSIDERATIONS.....</b>                    | <b>28</b> |
| 99  | <b>7.1. Statistical Methods .....</b>                        | <b>28</b> |
| 100 | <b>8. DATA COLLECTION AND SITE MONITORING .....</b>          | <b>29</b> |
| 101 | <b>8.1. Data Collection.....</b>                             | <b>29</b> |
| 102 | <b>8.2. Site Monitoring .....</b>                            | <b>30</b> |
| 103 | <b>9. RISK ASSESSMENT .....</b>                              | <b>30</b> |
| 104 | <b>9.1. Risks of Active Study Drug.....</b>                  | <b>30</b> |
| 105 | <b>9.2. Risks of Blood Draws.....</b>                        | <b>30</b> |
| 106 | <b>9.3. Minimization of Risks .....</b>                      | <b>30</b> |
| 107 | <b>9.4. Potential Benefits .....</b>                         | <b>31</b> |
| 108 | <b>9.5. Risks versus Benefits.....</b>                       | <b>31</b> |

|     |                                                                                   |           |
|-----|-----------------------------------------------------------------------------------|-----------|
| 109 | <b>10. HUMAN SUBJECTS</b> .....                                                   | <b>31</b> |
| 110 | <b>10.1. Selection of Subjects</b> .....                                          | <b>31</b> |
| 111 | 10.1.1. Equitable Selection of Subjects.....                                      | 31        |
| 112 | 10.1.2. Vulnerable Subjects.....                                                  | 31        |
| 113 | <b>10.2. Informed Consent</b> .....                                               | <b>31</b> |
| 114 | <b>10.3. Identification of Surrogates</b> .....                                   | <b>32</b> |
| 115 | <b>10.4. Justification of Surrogate Consent</b> .....                             | <b>32</b> |
| 116 | <b>10.5. Additional Safeguards for Vulnerable Subjects</b> .....                  | <b>33</b> |
| 117 | <b>10.6. Confidentiality</b> .....                                                | <b>33</b> |
| 118 | <b>11. ADVERSE EVENT REPORTING/SAFETY REPORTING</b> .....                         | <b>33</b> |
| 119 | <b>12. APPENDICES</b> .....                                                       | <b>36</b> |
| 120 | <b><u>APPENDIX A:</u> Guidelines for evidence of infection</b> .....              | <b>36</b> |
| 121 | <b><u>APPENDIX B:</u> Pleiotropic Effects of Vitamin C</b> .....                  | <b>38</b> |
| 122 | <b><u>APPENDIX C:</u> Ventilator Procedures</b> .....                             | <b>40</b> |
| 123 | C.1. Ventilator Management.....                                                   | 40        |
| 124 | C.2. Weaning.....                                                                 | 41        |
| 125 | C.3. Definition of Unassisted Breathing.....                                      | 42        |
| 126 | C.4. Definition of Extubation.....                                                | 42        |
| 127 | C.5. Completion of Ventilator Procedures .....                                    | 42        |
| 128 | C.6. Removal from the Ventilator Management Protocol .....                        | 42        |
| 129 | <b><u>APPENDIX D:</u> FACTT LITE Conservative Fluid Management Approach</b> ..... | <b>44</b> |
| 130 | <b>APPENDIX E: Time Events Schedule</b> .....                                     | <b>45</b> |
| 131 | <b>APPENDIX F: Adverse Events</b> .....                                           | <b>46</b> |
| 132 | <b>APPENDIX G: Modified SOFA Score Calculator</b> .....                           | <b>51</b> |
| 133 | <b>APPENDIX H: P/F from S/F Calculator</b> .....                                  | <b>52</b> |
| 134 | <b>REFERENCES CITED:</b> .....                                                    | <b>53</b> |
| 135 |                                                                                   |           |

136 **ABBREVIATIONS**

137  
138 ABG = Arterial blood gas  
139 AKI = Acute Kidney Injury  
140 ALI = Acute Lung Injury  
141 Ang-2 = Angiopoietin-2  
142 APACHE = Acute physiologic and chronic health  
143 evaluation  
144 AscA = Ascorbic Acid (Vitamin C)  
145 ARDS = Acute Respiratory Distress  
146 Syndrome  
147 BIPAP = Bi-level Positive Airway Pressure  
148 BMI = Body Mass Index  
149 CCC = Clinical Coordinating Center  
150 CK = Creatinine Kinase  
151 CPAP = Continuous Positive Airway  
152 Pressure  
153 CRP = C-reactive protein  
154 Day 0 = Day of Randomizations  
155 DHA = Dehydroascorbic Acid  
156 DSMB = Data Safety Monitoring Board  
157 FACTT = Fluid and Catheter Treatment  
158 Trial  
159 FDA=Food and drug administration  
160 FiO<sub>2</sub> = Fraction of Inspired Oxygen  
161 FIP = Feces Induced Peritonitis  
162 GCS = Glasgow Coma Scale  
163 ICU = Intensive care Unit  
164 IMV = Intermittent Mechanical Ventilation  
165 IRB = Institutional Review Board  
166 IVRS = Interactive Voice Response System  
167

168  
169  
170 LPS = Lipopolysaccharide  
171 MBW = measured body weight  
172 NFκB= Nuclear factor kappa B  
173 NHLBI = National Heart Lung and Blood  
174 Institute  
175 NIV=Non-invasive ventilation  
176 NOS= Nitric oxide synthase  
177 OI = Oxygenation Index = [mean airway  
178 pressure x F<sub>i</sub>O<sub>2</sub>]/PaO<sub>2</sub>  
179 PaCO<sub>2</sub>= Partial pressure of arterial carbon  
180 dioxide  
181 PaO<sub>2</sub> = Partial pressure of arterial oxygen  
182 PBW = Predicted Body Weight  
183 PCT = Procalcitonin  
184 PCV = Pressure Control Ventilation  
185 PEEP = Positive End-Expiratory Pressure  
186 PIN = Personal Identification Number  
187 Pplat = Plateau pressure  
188 PSV = Pressure Support Ventilation  
189 PAOP = Pulmonary Artery Occlusion Pressure  
190 RAGE = receptor for advanced glycation end  
191 products  
192 RCT = Randomized Controlled Trial  
193 SBT = Spontaneous Breathing Trial  
194 SIRS = Systemic Inflammatory Response  
195 Syndrome  
196 SOFA =Sequential Organ Failure Assessment  
197 SpO<sub>2</sub> = Oxygen Saturation  
198 TFPI = Tissue Factor Pathway Inhibitor  
199 TM = Thrombomodulin  
200 VFD = Ventilator-free Day

201

202

## DEFINITIONS

203

204

**Acute Kidney Injury:** Acute kidney injury network Stage 3 disease, defined as a threefold increase in creatinine from baseline or the need for dialysis

205

206

**Asian:** A person having origins in any of the original peoples of the Far East, Southeast Asia, or the Indian subcontinent including, for example, Cambodia, China, India, Japan, Korea, Malaysia, Pakistan, the Philippine Islands, Thailand, and Vietnam.

207

208

209

**Completing 48 hours of Unassisted Breathing (UAB) :** Defined as the date (calendar day) that the subject reaches exactly 48 hours of UAB. Example: if subject meets UAB at 1900 on 6/1/14 and does not return to assisted breathing (AB), then the date of completing 48 hours of UAB would be 6/3/14.

210

211

212

**Date of first UAB:** Defined as the first day that the subject is on UAB from midnight to midnight. Example: if subject meets UAB at 1900 on 6/1/14, then the date of first UAB would be 6/2/14, as long as subject does not return to AB on 6/2/14.

213

214

215

**Extubation:** Removal of an orotracheal, nasotracheal tube, or unassisted breathing with a tracheostomy

216

217

**Home:** Level of residence or health care facility where the patient was residing prior to hospital admission

218

219

220

**NYHA:** New York Heart Association Class IV subjects (defined as subjects who have cardiac disease resulting in inability to carry out physical activity without discomfort. Symptoms of cardiac insufficiency or an anginal syndrome may be present even at rest. If any physical activity is undertaken, discomfort is increased).

221

222

223

**Severe Sepsis:** SIRS criteria plus suspected or known infection plus organ dysfunction. Since intubation and hypoxemia is a requirement for enrollment into this trial, participants will, by definition, meet the SIRS criterion.

224

225

**Study hospital:** Defined as the hospital where the patient was randomized and enrolled.

226

227

228

**Study withdrawal:** Defined as permanent withdrawal from study before completion of study activities. This does not include those subjects who have completed the protocol procedures or stopped procedures because they have reached unassisted breathing. If a patient or surrogate requests withdrawal from the study the clinician should seek explicit permission to continue data collection.

229

230

231

**UAB (Unassisted Breathing):** Spontaneously breathing with face mask, nasal prong oxygen, or room air, T-tube breathing, tracheostomy collar (mask) breathing, or CPAP  $\leq 5$  without PSV or IMV assistance, or the use of noninvasive ventilation solely for sleep-disordered breathing. Assisted breathing is any level of ventilatory support at pressures higher than the unassisted breathing thresholds.

232

233

234

236 **Title:** Vitamin **C** Infusion for **T**reatment In **S**epsis **A**ssociated **A**cute **L**ung Injury  
237  
238 **(CITRIS-ALI)**

239 **Objective:** To assess the efficacy of a 96-hour intravenous vitamin C infusion protocol (200 mg/kg per 24  
240 hours) in patients with established acute lung injury (ALI) from sepsis. In this course of performing this phase  
241 II trial we will explore three hypotheses:

242  
243 **Hypothesis:**

244 **Hypothesis 1A:** Vitamin C infusion will significantly attenuate sepsis associated systemic organ failure as  
245 measured by Sequential Organ Failure Assessment (SOFA) score

246 **Hypothesis 1B:** Vitamin C infusion will attenuate sepsis associated lung injury as assessed by oxygenation  
247 index and the VE 40 (see below)

248 **Hypothesis 1C:** Vitamin C infusion will attenuate biomarkers of inflammation (C-Reactive Protein,  
249 Procalcitonin), vascular injury (Thrombomodulin, Angiopoietin-2), alveolar epithelial injury (Receptor For  
250 Advanced Glycation End Products), while inducing the onset of a fibrinolytic state (Tissue Factor Pathway  
251 Inhibitor).

252  
253 **Study Design:**

- 254 1. Multi-center, prospective, randomized, placebo-controlled clinical trial
- 255 2. A maximum of 170 patients will be enrolled
- 256 3. Participants will be randomized to receive either intravenous Vitamin C (mixed in 5% dextrose in  
257 water) or placebo (5% dextrose in water)
- 258 4. Active treatment will continue for 96 hours, discharge from study hospital, discharge from the  
259 ICU, study withdrawal, or death, whichever comes first.
- 260 5. All participants will be followed for a total of 60 days.

261  
262 **Analysis/Interim Monitoring:**

- 263 1. The principal analysis will be on the basis of the intention-to-treat.
- 264 2. Protocol compliance will be monitored by the study team by presentation of 1<sup>st</sup> two enrolled  
265 subjects per site to the team. This will take place via investigator conference call and will  
266 address challenges encountered. Trial progress will be monitored by an independent Data and  
267 Safety Monitoring Board to determine if the study should stop for safety reasons. As an early  
268 phase study it is important to collect as much data as possible. For this reason the study will only  
269 be halted by the DSMB for reasons of patient safety concerns. The first scheduled analysis will  
270 occur after the enrollment of 80 patients or semi-annually, whichever happens first. The next  
271 review will occur after enrollment of the last enrolled subject, or semi-annually, whichever comes  
272 first. In the event that safety concerns arise prior to the scheduled analysis, the DSMB may  
273 request an unscheduled review at any time. The Data and Safety Monitoring Board (DSMB) will  
274 also monitor trial quality.
- 275 3. Regulatory compliance, GCP, and risk-based monitoring will be provided by an independent  
276 CRO.

277  
278  
279 **CITRIS-ALI Inclusion and Exclusion Criteria:**

280 The inclusion and exclusion criteria for the CITRIS-ALI trial is listed here and in the full CITRIS-ALI protocol.  
281 The definition of severe sepsis for this study is derived and defined as previously published in the referenced  
282 literature.<sup>1,2,3</sup>



283 **CITRIS-ALI Inclusion Criteria:**

284 Patients must have suspected or proven infection, and meet 2 out of 4 of the criteria for Systemic Inflammatory  
285 Response (SIRS) due to infection, and be accompanied by at least 1 criterion for sepsis associated organ  
286 dysfunction, and meet all 5 criteria for Acute Respiratory Distress Syndrome (ARDS).

- 287 1. Suspected or proven infection: (e.g., thorax, urinary tract, abdomen, skin, sinuses, central venous  
288 catheters, and central nervous system, see Appendix A).
- 289 2. The presence of a systemic inflammatory response: Defined as: *fever*: >38°C (any route) or  
290 *hypothermia*: <36°C (core temp only), *tachycardia*: heart rate > 90 beats/min or receiving medications  
291 that slow heart rate or paced rhythm, *leukocytosis*: >12,000 WBC/ $\mu$ L or *leukopenia*: <4,000 WBC/ $\mu$ L  
292 or >10% band forms. Respiratory rate > 20 breaths per minute or PaCO<sub>2</sub> < 32 or invasive mechanical  
293 ventilation.
- 294 3. The presence of sepsis associated organ dysfunction: (any of the following thought to be due to  
295 infection)
- 296 a. Sepsis associated hypotension (systolic blood pressure (SBP) < 90 mm Hg or an SBP decrease  
297 > 40 mm Hg unexplained by other causes or use of vasopressors for blood pressure support  
298 (epinephrine, norepinephrine, dopamine  $\neq$  5mcg, phenylephrine)
  - 299 b. Arterial hypoxemia (PaO<sub>2</sub>/FiO<sub>2</sub>  $\leq$  300) or supplemental O<sub>2</sub> > 6LPM.
  - 300 c. Lactate > upper limits of normal laboratory results
  - 301 d. Urine output < 0.5 ml/kg/hour for > two hours despite adequate fluid resuscitation
  - 302 e. Platelet count < 100,000 per mL
  - 303 f. Coagulopathy (INR > 1.5)
  - 304 g. Bilirubin > 2 mg/dL
  - 305 h. Glasgow Coma Scale < 11 or a positive CAM ICU score
- 306 4. ARDS characterized by all the following criteria
- 307 a. Lung injury of acute onset, within 1 week of an apparent clinical insult and with progression of  
308 respiratory symptoms
  - 309 b. Bilateral opacities on chest imaging not explained by other pulmonary pathology (e.g. pleural  
310 effusions, lung collapse, or nodules)
  - 311 c. Respiratory failure not explained by heart failure or volume overload
  - 312 d. Decreased arterial PaO<sub>2</sub>/FiO<sub>2</sub> ratio  $\leq$  300 mm Hg
  - 313 e. Minimum PEEP of 5 cmH<sub>2</sub>O
- 314

315 **CITRIS-ALI Exclusion Criteria:**

- 316 1. Known allergy to Vitamin C
- 317 2. inability to obtain consent;
- 318 3. age < 18 years;
- 319 4. Not on a ventilator
- 320 5. more than 48 hrs since meeting ARDS criteria;
- 321 6. No indwelling venous or arterial catheter in patients requiring insulin in a manner that requires glucose
- 322 being checked more than twice daily (e.g. continuous infusion, sliding scale)
- 323 7. Presence of diabetic ketoacidosis
- 324 8. patient or surrogate or physician not committed to full support (not excluded if patient would receive all
- 325 supportive care except for cardiac resuscitation);
- 326 9. pregnancy or breast feeding,
- 327 10. moribund patient not expected to survive 24 hours;
- 328 11. home mechanical ventilation (via tracheotomy or noninvasive) except for CPAP/BIPAP used only for
- 329 sleep-disordered breathing;
- 330 12. on home O2 > 2LPM, except for with CPAP/BIPAP
- 331 13. diffuse alveolar hemorrhage (vasculitis);
- 332 14. interstitial lung disease requiring continuous home oxygen therapy;
- 333 15. Active kidney stone
- 334 16. Non English speaking;
- 335 17. ward of the state (inmate, other).

336 **Primary Objective:**

337 To assess the efficacy of a 96-hour high dose intravenous vitamin C infusion protocol (200 mg/kg per

338 24 hours) in patients with established ALI/ARDS that results from severe sepsis. Patients will be randomized to

339 receive either: 1) **Placebo** (50 ml of 5% dextrose in water) or **Vitamin C** (sterile L-ascorbic acid for injection at

340 200 mg/kg per 24 hours with entire calculated 24 hour dose diluted in 200 ml of 5% dextrose in water). One

341 fourth of the 24 hour calculated dosage will be administered in 30 minute intravenous infusions will occur every

342 6 hours.

343

344 **Endpoints:**

345 The CITRIS-ALI trial will depart from prior acute lung injury trials in that assessment of efficacy will not include

346 28-day all-cause mortality as a primary endpoint. As directed in **RFA-HL-12-022**, primary end points will focus

347 on quantifiable measures of organ function and biomarker analysis (SOFA, CRP, Procalcitonin,

348 Thrombomodulin). For this phase II trial we propose co-primary endpoints.

349

350 **Primary Endpoint #1:** Change in SOFA score at 96 hours as compared to baseline when compared to

351 placebo.

352 **Primary Endpoint #2:** C-Reactive Protein and Thrombomodulin at study hours 0, 48, 96, 168 when

353 compared to placebo.

354

355 **Secondary Endpoints:**

- 356 • Oxygenation Index ( $FiO_2 \times \text{Mean Airway Pressure}/PO_2$ ) at study hour 0, 48, 96, 168 if still intubated in
- 357 ascorbate infused patient compared to placebo.
- 358 • VE-40 ( $\text{Vent RR} \times \text{TV}/\text{Weight}$ )  $\times$  ( $\text{PaCO}_2/40$ ) at study hour 0, 48, 96, 168 if still intubated, in ascorbate
- 359 infused patient compared to placebo
- 360 • SOFA scores at hours 48, 96, 168
- 361 • SOFA Score Components at hours 48,96, 168
- 362 ○ PaO<sub>2</sub>/FiO<sub>2</sub>

- SpO2/FiO2
- Platelets
- Total Bilirubin
- Vasopressor status
- GCS
- Creatinine or Urine Output
- Procalcitonin, Receptor for Advanced Glycation End Products, Tissue Factor Pathway Inhibitor at study hour 0, 48, 96, 168
- Ascorbate level at hour 0, 48, 96, 168
- Ventilator Free Days to day 28
- ICU-free days at day 28
- All cause mortality to day 28
- Hospital-free days at day 60

**Focused Safety Analysis:** Given that L-Ascorbate is an “acid” the drug manufacturer adjusts the pH thus balancing pH at 7.4 and negating the acid effect of the drug. Unexplained metabolic acidosis will be addressed per standard of care for each participating institution.

### **Study Drug Dosing:**

1. **First study drug dose** (L-ascorbic acid or placebo) will be considered “Dose 1” and will be administered within 6 hours of randomization or the earliest available time post any clinically indicated procedure which requires the patient to be off the unit. All doses will be administered in the ICU. Patients receiving vitamin C will receive 25% of the total daily calculated dosing (200mg/kg/24 hours) and will be infused over 30 minutes for this first dosing.
2. **Subsequent doses** which represent 25% of the day’s total dose will be infused every six hours through 96 hours (+/- 3 hours).
  - a. Timing of Dose 2 will be triggered by the physician order for q 6 hour administration and will therefore be listed on the bedside MAR. As such, timing of Dose 2 may be out of the +/- 3 hour window and will not trigger a protocol deviation.
  - b. If for any reason any other maintenance dose is not administered within window, the dose will be skipped and the next scheduled dose will be given and documented in the data collection tool.

**Drug level specimens (venous blood):** Septic patients exhibit subnormal plasma ascorbate levels. Phase I studies performed at Virginia Commonwealth University (VCU) show mean ascorbate levels of 17.5 µM (normal human ascorbate levels 60 to 70 µM). Entry ascorbate levels will be drawn.

The target plasma range for modifying pro-inflammatory biomarkers and for attenuating vascular injury was obtained from the phase I safety trial and is greater than 500 µM as measured 24 hours after initiation of Vitamin C infusion. The day 2 – 7 plasma ascorbate levels are expected to be between 500 to 1000 µM based on pharmacokinetic studies generated during the phase I trial (VCU trial was entitled: Vitamin C Infusion in Human Sepsis).

Blood drawn for ascorbate levels and biomarkers will occur at hour 0 (prior to the first infusion), hour 48 (+ or – 3 hours as long as it is drawn prior to Infusion 9), hour 96 (+ or – 3 hours as long as it is drawn at least 3 hours post Infusion 16), and hour 168 (+ or – 6 hours). If patient is moved out of the ICU to another hospital unit, DO continue to collect blood for biomarkers and ascorbate levels.

If arterial line is removed prior to hour 168, do not collect arterial blood for PO2 analysis (SOFA Score component).

414  
415 **Completion of study drug administration:** Study drug administration will be stopped when one of the  
416 following conditions is met, whichever comes first:

- 417 1. Final drug dose at 96 hours
- 418 2. Discharge from study hospital
- 419 3. Loss of indwelling venous or arterial catheter with no intent to replace the line, making it impossible to  
420 monitor glucose levels via central laboratory without multiple peripheral sticks.
- 421 4. Discharge from the ICU
- 422 5. Withdrawal from study
- 423 6. Death

424  
425  
426  
427  
428  
429  
430  
431  
432  
433  
434  
435  
436  
437  
438  
439  
440 **Part II: Study Description** Vitamin **C** Infusion for **T**reatment In **S**epsis Associated **A**cute **L**ung **I**njury  
441 **CITRIS-ALI**

---

442 **1. Background**

443  
444 **1.1. Introduction**

445  
446 Pneumonia and extrapulmonary sepsis account for 50-65% of all ALI cases and mortality is high. Rising  
447 rates of hospitalization and death due to sepsis continue to be a worsening global health care problem.<sup>4</sup> A  
448 large fraction of patients with severe sepsis develop acute lung injury (ALI) or its severe form, the acute  
449 respiratory distress syndrome (ARDS).<sup>5</sup> The pathogenesis of ALI is characterized by activation of tissue  
450 inflammation, oxidant mediated tissue injury and increased vascular leak. At a molecular level, sepsis is  
451 associated with activation of pro-inflammatory mediators driven by transcription factor nuclear factor kappa B  
452 (NF- $\kappa$ B). The pathogenesis of ALI is characterized by activation of tissue inflammation, oxidant mediated  
453 tissue injury and increased vascular leak. These mediators are important for host defense against invading  
454 bacteria, but their uncontrolled and excessive production ultimately contributes to the pathogenesis of ALI.

455  
456 The lung is an important target of inflammatory mediators in severe sepsis<sup>6</sup> and increased pulmonary NF- $\kappa$ B  
457 drives inflammatory mediators in severe sepsis.<sup>7</sup> Reactive oxygen species (ROS) produced by lung cells  
458 oxidize vital lung proteins and activate redox-sensitive pathological signaling pathways. An extensive body of  
459 evidence shows a crosstalk between the cellular signaling pathways and the cellular redox state through  
460 multiple mechanisms. However, exuberant ROS synthesis may also damage cells and host tissues, and, thus,  
461 contribute to the pathogenesis of ALI. Although the potential role of antioxidant enzymes and scavengers of  
462 ROS in reducing the severity of ALI has been recognized, no single agent or treatment strategy has shown  
463 sufficient promise for use in routine clinical practice.

464  
465 Ascorbic acid is an essential vitamin for humans, primates, guinea pigs, and a few other animals and insects  
466 that lack the enzyme L-gulonolactone oxidase. Ascorbic acid is an essential vitamin for humans, primates,  
467 guinea pigs, and a few others.<sup>8</sup> Ascorbic acid is transported into specialized cells as reduced ascorbic acid  
468 (AscA) by sodium dependent ascorbic acid transporters (SVCT-1 and SVCT-2) or in most cells in its oxidized  
469 form as dehydroascorbic acid (DHA) via facilitative glucose transporters.<sup>9,10</sup> When DHA is transported via the  
470 glucose transporters, it is rapidly reduced and trapped inside the cell, where it accumulates as reduced  
471 ascorbic acid. Although ascorbic acid circulates in normal human plasma at approximately 60 - 70  $\mu$ M, it  
472 accumulates in millimolar concentrations in host defense cells.<sup>11</sup> Together with glutathione, AscA constitutes a  
473 primary line of defense against ROS and participates in the recycling of other antioxidants such as vitamin E. A  
474 growing body of evidence supports the notion that vitamin C is "negatively" involved in the pathogenesis of  
475 sepsis.<sup>12</sup> Subnormal ascorbate concentrations are common features of patients with sepsis. Furthermore,  
476 plasma ascorbate levels correlate inversely with multiple organ failure<sup>13</sup> and directly with survival.<sup>14</sup> Despite all  
477 the evidence, ascorbate is not used in a clinical setting.

478  
479 At physiological pH, AscA dissociates to form dehydroascorbic ascorbate.<sup>15</sup> Ascorbate functions as an  
480 antioxidant by inhibiting cell death induced by hydrogen peroxide<sup>16</sup> and DNA damage induced by oxidative  
481 stress.<sup>17</sup> Ascorbate also functions as a cofactor for various enzymatic hydroxylation reactions and is involved in  
482 the biosynthesis of collagen, carnitine and norepinephrine.<sup>18,19,20</sup> As noted, circulating levels of ascorbate are  
483 low in patients with sepsis and plasma ascorbate correlates directly with survival and inversely with multiple  
484 organ failure. Similar results have been observed in animal models of sepsis. Ascorbate administration  
485 improves capillary blood flow, liver function and arteriolar responsiveness in experimental models of  
486 sepsis.<sup>21,22,23</sup> In mice injected with pathogenic bacteria, prior ascorbate depletion results in decreased  
487 survival.<sup>24</sup> Recently ascorbate was shown to regulate the stability of a master transcription factor HIF-1.<sup>25</sup> As  
488 noted, circulating levels of ascorbate are low in patients with sepsis and plasma ascorbate may protect  
489 microvascular function by two distinct mechanisms: a) by inhibiting NADPH oxidase activation and b) by  
490 increasing endothelial nitric oxide synthase (eNOS) activity, and subsequently suppressing expression of  
491 NADPH oxidase, inducible nitric oxide synthase and tissue factor.<sup>26</sup> However, little is known about the effects  
492 of ascorbate administration in the setting of sepsis-mediated ALI. Gram-negative sepsis is a leading cause of  
493 ALI/ARDS and multiple organ failure.<sup>27</sup> Intra-peritoneal injection of a single bolus of bacterial LPS precipitates a  
494 systemic inflammatory response that resembles in many ways the observed clinical profile of sepsis including  
495 ALI and ARDS.<sup>28</sup> It is well known that LPS activates inflammatory cells such as polymorphonuclear leukocytes,  
496 monocytes, macrophages and lymphocytes. Besides immune cells, microvascular endothelial cells in multiple  
497 organs also become activated in sepsis and may contribute to amplification of the inflammatory response.  
498 Moreover, it is generally agreed that it is not the bacterial infection itself, but rather the inflammatory response  
499 to infection that is the predominant determinant of outcome in sepsis.<sup>29,30</sup> In support of this hypothesis, it has  
500 been shown that septic stimuli initiate activation of transcription factors that transactivate multiple genes such  
501 as pro-inflammatory cytokines, adhesion molecules and chemokines by endothelial cells.<sup>31,32</sup> Not surprisingly,  
502 efforts to block single components of the sepsis-associated inflammatory pathways have had little impact on  
503 patient survival and little progress has been made in improving outcomes.<sup>33,34</sup>

504  
505 **Summary:** Sepsis is a common clinical problem that frequently leads to widespread acute vascular injury that  
506 is clinically manifested by multiple organ failure. One of the most frequent organs injured following onset of  
507 sepsis is the lung.<sup>35</sup> At present, no truly specific therapy is available for acute lung injury (or other organ  
508 injury) that occurs in association with sepsis. The preliminary data presented below suggests that ascorbic  
509 acid may present a means by which sepsis-associated vascular injury can be interrupted or reversed. AscA  
510 has been intravenously infused in humans in high dosages previously. Nathens et al infused 1.5 grams of  
511 AscA every 8 hours into surgical trauma ICU patients daily for 28 days with no adverse events.<sup>36</sup> Muhlhofer et  
512 al infused high dose ascorbic acid (7500 mg) intravenously into human volunteers daily for 7 days and  
513 showed no adverse events.<sup>37</sup> Finally, Tanaka et al infused high-dose ascorbic acid (66 mg/kg/hour, average  
514 110 grams for 70 kg human) for 24 hours into patients with over 50% total body surface area burns.<sup>38</sup> No  
515 abnormalities in hematologic, hepatic, or renal function was associated with ascorbate infusion at day 7  
516 following ascorbate administration. The scope of the study being presented in this phase II proof of concept

517 trial involves the use of intravenously administered AscA as a future potential therapy for sepsis associated  
 518 acute lung injury. Previous basic scientific research currently suggests that AscA can attenuate sepsis-  
 519 associated vascular injury. Further, prior data obtained from our phase I human safety studies suggests that  
 520 high doses of AscA can be administered intravenously with little or no adverse events. Given these realities  
 521 and the results of our phase I trials in human sepsis, we propose that intravenous AscA may present a unique  
 522 therapy to improve the outcomes in human sepsis associated acute lung injury.  
 523  
 524  
 525

## 526 1.2. Preliminary Progress – Vitamin C Intervention in Experimental Septic Lung Injury

527  
 528 We sought to examine the biological effects of ascorbic acid (AscA) infusion on systemic inflammatory  
 529 responses and acute organ injury associated with bacterial sepsis. To accomplish this, we created a durable  
 530 model of septic shock and acute lung injury in wild type C57BL6 mice. Beyond the creation of an animal model  
 531 system of acute lung injury, a primary goal of these studies was to determine the extent to which ascorbic acid  
 532 could be employed as an **interventional therapy** for bacterial sepsis. Multiple prior animal studies published  
 533 over the years have examined pharmacological agents (e.g., methyl prednisolone, ibuprofen, simvastatin) and  
 534 biological agents (e.g., monoclonal antibody to tumor necrosis factor alpha, interleukin-1 receptor antagonist)  
 535 as potential sepsis therapies. Many agents have shown efficacy in sepsis when the agent was administered  
 536 prior to induction of sepsis. In a “real world” setting, however, any intervention for sepsis will follow the  
 537 development of symptoms and altered physiology.  
 538  
 539

In preliminary studies described here, an interventional approach (agent administered after onset of sepsis)  
 540 was employed to test the impact of ascorbic acid infusion on the course of sepsis associated acute lung injury. Sepsis was induced in mice by intraperitoneal (IP) administration of E coli lipopolysaccharide (LPS, 0111:B4) at a concentration of 10 mcg/gram of body weight. Animals had average body weights of 30 grams.

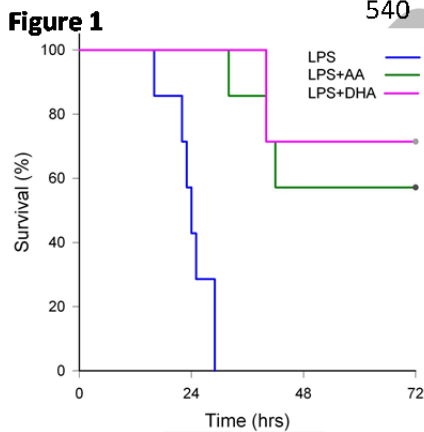

Our first goal was to examine whether AscA infusion altered the course of murine sepsis. In these studies, mice received IP LPS at the stated dose.

Thirty minutes following LPS infusion, animals received intraperitoneal either the reduced form of vitamin C (AscA) or the oxidized form of vitamin C dehydroascorbate (DHA) at doses of

554 **200 mg/kg of body weight**. Both the reduced form and the oxidized form were employed in separate experiments. Following LPS infusion, animals were then given free access to food and water. Mortality was observed over the ensuing 60 hours. **Figure 1** shows Kaplan-Meier survival curves of septic mice treated with AscA and DHA. These studies show that mortality induced by E coli sepsis in wild type mice was significantly improved by both ascorbic acid forms during the 60 hour observation period.

**Figure 2**

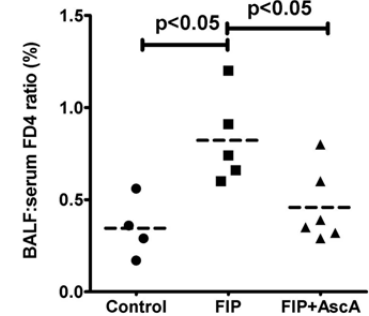

561 Sepsis is frequently accompanied by acute lung injury (ALI). Sepsis associated ALI is characterized by acute  
 562 pulmonary edema and respiratory failure. Pulmonary edema results from loss of pulmonary

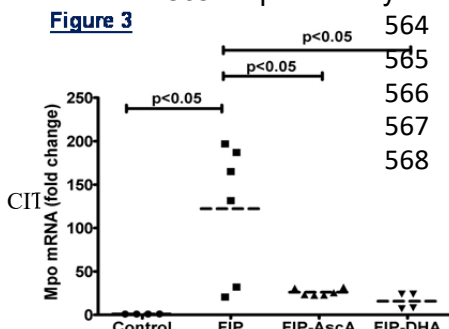

564 microvascular endothelial integrity that leads to loss of endothelial “barrier  
 565 function.” There is subsequent flooding of the dry airspaces of lung with  
 566 plasma and cellular constituents. ALI is also characterized by intense  
 567 sequestration of activated polymorphonuclear neutrophils (PMN). We  
 568 assessed the loss of pulmonary microvascular barrier function using

bronchoalveolar lavage fluid (BALF) protein analysis 16 hours following LPS infusion. **Figure 2** shows that LPS treated mice exhibit significant increases in BALF protein, indicating a loss of barrier function. Asca treatment significantly attenuated microvascular injury as assessed by BALF protein.

In a second model of sepsis (fecal induced peritonitis, FIP), lungs were removed and total RNA isolated. Quantitative real time PCR (QPCR) was performed for myeloperoxidase mRNA (surrogate for assessing the extent of PMN sequestration). **Figure 3** shows that untreated septic murine lung is characterized by significant PMN sequestration. Both Asca and dehydroascorbic acid (DHA) significantly attenuated PMN sequestration.

**Figure 4** shows H&E stains of sections of lungs removed at 16 hours following onset of feces induced peritonitis. As seen in this figure, intense cellular sequestration and septal edema is present in the lung of unprotected FIP-treated mice. In contradistinction, Asca treatment significantly attenuated the histological findings of murine sepsis.

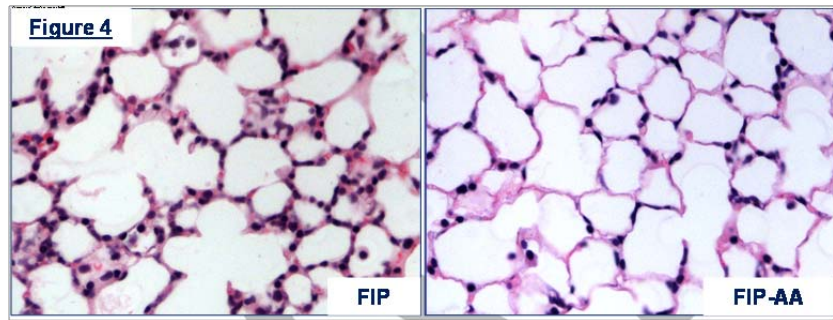

hours

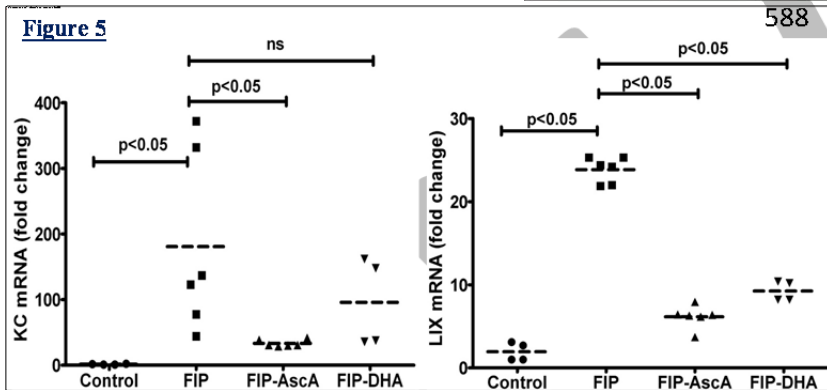

Sepsis is characterized by the development of a severe proinflammatory state with the rapid onset of expression of multiple NF- $\kappa$ B driven genes. **Figure 5** shows that septic murine lung is characterized by the presence of significant expression of two nuclear NF- $\kappa$ B activated genes examined via quantitative real time PCR (KC [murine IL-8 homologue], LIX). Asca and DHA administered following onset of sepsis significantly reduced the expression of these

genes.

Bacterial sepsis is virtually always accompanied by disordered coagulation and is frequently associated with disseminated intravascular coagulation (DIC). A large body of significant scientific literature has documented the disruption of microvascular function/integrity induced by DIC.<sup>39</sup> Uncontrolled DIC uniformly induces activation of multiple proinflammatory coagulation-associated proteases that activate both intrinsic and extrinsic coagulation pathways. The resulting "cascade effect" produces widespread microvascular thrombus formation and subsequent

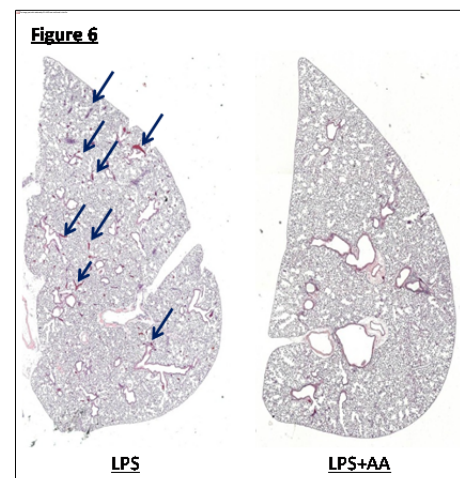

the

of

**Figure 7**

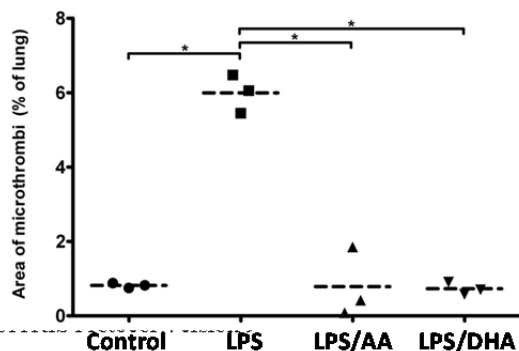

multiple organ injury and failure. DIC frequently produces acute lung injury.<sup>40</sup> We examined extent of microvascular thrombosis in the lungs of our LPS-treated wild type mice. Sixteen hours after LPS infusion lungs were fixed, paraffin embedded, and H&E stained sections examined for the presence of microthrombi. **Figure 6**, shows that untreated septic lungs exhibit extensive microvascular thrombosis

(arrows). However, in AscA-treated septic lungs (**Figure 6**), virtually no microthrombi were observed. A Zeiss light microscope outfitted with a Axiovision counting software program was used to label and quantify microthrombi between multiple lung sections. **Figure 7** shows that LPS (without treatment) produced highly significant numbers of micro thromboses. AscA intervention in septic mice abolished virtually all microthrombi. Similar findings were obtained in DHA treated lungs (data not shown).

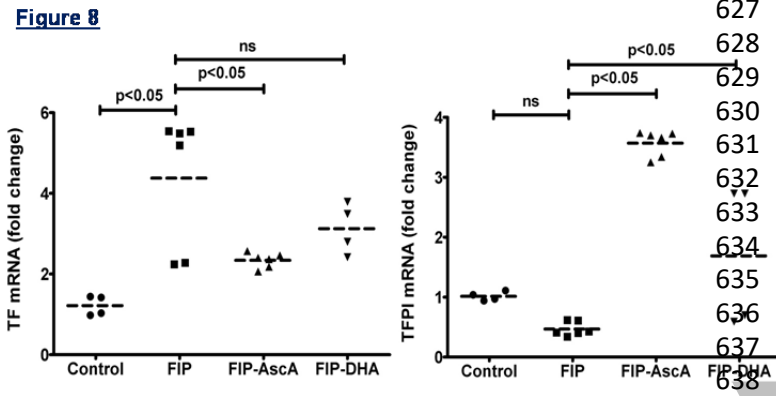

627 Following the onset of sepsis, multiple studies  
 628 now show that sepsis-associated activation of  
 629 **Tissue Factor** (factor III) is the sentinel event  
 630 that induces the coagulation factor cascade  
 631 leading to DIC. In further preliminary studies, we  
 632 examined the expression of tissue factor in the  
 633 lungs of septic mice using QPCR. **Figure 8**  
 634 shows that both AscA and DHA dramatically  
 635 attenuated the expression of tissue factor in  
 636 septic lungs while inducing the inhibitor  
 637 profibrinolytic peptide tissue factor pathway  
 638 inhibitor (TFPI).

639 **Summary Of Preliminary Animal Studies:** During the animal modeling studies, no untoward effects of AscA  
 640 or DHA on animal subjects was observed. The preliminary data shows convincingly that ascorbic acid is  
 641 capable of significantly altering the course of biological events which arise following the onset of bacterial  
 642 sepsis that lead to lung injury. Our results show significant impacts on sepsis induced mortality with both the  
 643 reduced and oxidized forms of AscA.  
 644  
 645

### 646 1.3 Phase I Human Trial: Vitamin C Infusion In Human Sepsis: Preliminary Results From A Safety Trial

647 Our animal modeling studies strongly suggested that vitamin C augmentation reverses detrimental septic  
 648 biology that leads to lung injury. On the strength of these studies, we proceeded with a human trial. In 2010,  
 649 following IRB approval, a phase I, randomized, double blind, placebo-controlled trial testing the safety of  
 650 parenteral vitamin C in patients with severe sepsis was initiated at the VCU Medical Center. All patients  
 651 enrolled, regardless of study arm, received full ICU standard of care. Patients were randomized to placebo (5%  
 652 dextrose/water, D5W), low dose vitamin C (50 mg/kg/24hr), or high dose vitamin C (200 mg/kg/24hr). The  
 653 calculated 24 hour vitamin C dose was divided into four equal doses and administered intravenously (in 50 ml  
 654 D5W) over 30 minutes every 6 hours for 96 hours. Vital signs were monitored every 5 minutes during infusion  
 655 and for 45 minutes afterwards by bedside ICU Nursing and the investigative team. **Hypotension, tachycardia,**  
 656 **and nausea/vomiting and hypernatremia** were the primary safety outcomes assessed. A multi-departmental  
 657 data safety monitoring board oversaw patient enrollment into the trial. Serum/plasma specimens were obtained  
 658 every twelve hours for 2 days, then once daily for two days. **Enrollment:** Over a 1 year period, twenty-four  
 659 patients were randomized to the three groups (*Placebo*, 4M, 4F, age 54-68 yrs.), (*Lo-VitC*, 5M, 3F, age 30-70  
 660 yrs.), (*Hi-VitC*, 4M, 4F, age 44-92 yrs.). **APACHE II score at Enrollment:** Mean APACHE II scores between  
 661 groups were: *Placebo* - 20.4 (range: 15-29), *Lo-VitC*: 20.2 (range: 12-33), and *Hi-VitC*: 24 (range: 17-33)  
 662 respectively. The groups were statistically identical.

663 **Phase I Primary Outcomes: Safety of Vitamin C Infusion:** Safety of vitamin C infusion was the primary  
 664 focus of this trial. During the 96 hour infusion period, no patients were withdrawn due to identified negative  
 665 outcomes (hypotension, tachycardia, nausea/vomiting, or hypernatremia). Infusions were halted in one patient  
 666 (Hi-VitC) following infusion #14 (80hrs) for a ventricular arrhythmia later determined by Cardiology to be  
 667 artifact. This patient is included in the analysis. One patient (Hi-VitC) was transferred to another facility at 48  
 668 hours at the insistence of family and was lost to follow up.



Figure 9

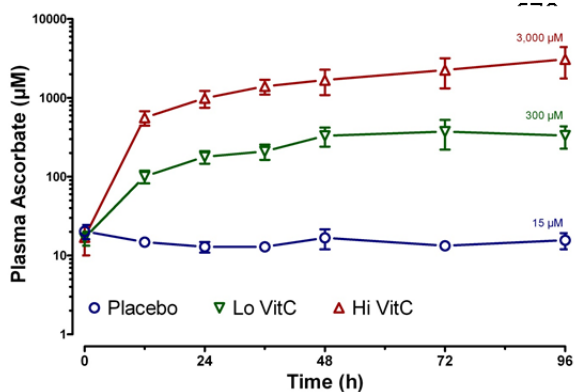

**Plasma Ascorbate Levels in Human Sepsis: The impact of Vitamin C Infusion:**

Vitamin C levels were quantified by HPLC in all patients at enrollment then at defined intervals to 96 hours. Ascorbate levels in all septic patients at enrollment were subnormal (hyposcORBic) at  $17.9 \pm 2.4 \mu\text{M}$  (normal  $50 - 70 \mu\text{M}$ ) and were not significantly different at baseline. Figure 9 shows the change in plasma ascorbate levels through time across patient groups. Ascorbate levels rose rapidly in the two treatment groups and were significantly higher than placebo within twelve hours (Lo-VitC vs. placebo  $P < 0.005$ , Hi-VitC vs. placebo  $p < 0.0005$ ) remaining consistently elevated for 96 hours. Ascorbate levels in the Hi-VitC group were significantly

681  
682

higher than the Lo-VitC group from the 12 hour point forward. These data show that an intermittent ascorbate infusion protocol (every 6 hour) produces sustained steady state levels.

Figure 10

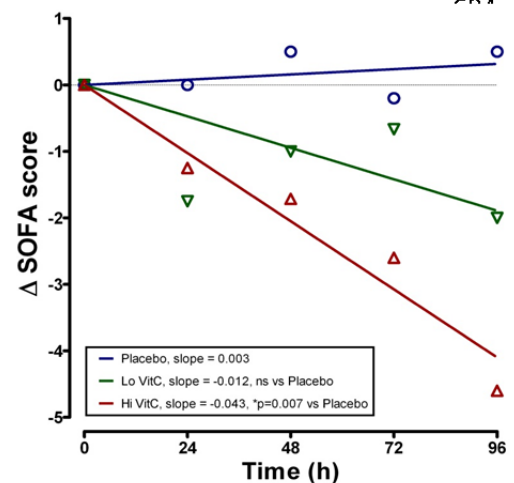

683

**Sequential Organ Failure Assessment (SOFA) Scores**

SOFA scores obtained are robust indicators of mortality during critical illness.<sup>41</sup> Increases in SOFA scores during the first 48 hours of ICU care predicts a mortality rate of at least 50%. Initial SOFA scores at enrollment were: placebo -  $13.3 \pm 2.9$ , Lo-VitC -  $10.1 \pm 2.0$ , and Hi-VitC  $10.8 \pm 4.4$  and were not significantly different across groups.

Figure 10 shows that patients treated with high dose of vitamin C exhibited significantly lower SOFA scores when compared to placebo over the 96 hour period. SOFA scores among treated patients did not exhibit any subsequent rise whereas patients in the placebo group exhibited a gradual rise in scores. Though the cohort size is limited, these early data suggest that vitamin C infusion attenuates systemic organ injury associated with sepsis.

**Phase I Trial Secondary Outcomes:**

697

on vasopressor (DOVP), 2) ventilator free days (VFD), and 3) ICU days (ICUD), were monitored as secondary outcomes. We observed trends for fewer DOVP and ICUD and more VFD in the Lo-VitC patients, but the numbers were small and statistically insignificant. Though this study was not powered to assess mortality, we present the results of 28 day all-cause mortality as a prospectively identified secondary outcome (Fig 11). In the placebo group we found a 63% mortality (5 of 8 patients died). In the Lo-VitC, 3 of 8 patients died for 38% mortality, and 4 of 7 patients died in the Hi-VitC for a mortality of 57%. The data showed in figure 11 further attests to the safety of the vitamin C dosing regimens in that there was no additional added mortality among the treatment group patients when compared to placebo.

Figure 11

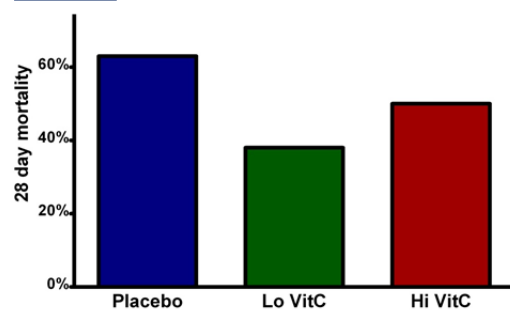

707

**Vitamin C Infusion Attenuates Biomarkers of Inflammation and Endothelial Injury In Patients with Severe Sepsis**

Sera obtained from enrolled subjects was analyzed for three biomarkers: C-reactive protein (CRP), procalcitonin (PCT), and thrombomodulin (TM). CRP and PCT were quantified as surrogates for inflammation while TM was employed as a surrogate for endothelial injury. At enrollment, biomarker levels across the three groups were not

Figure 13

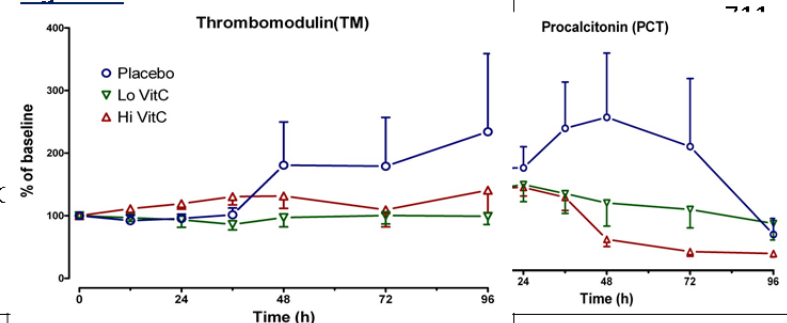

716 significantly different. CRP and PCT levels in all patient groups started high and trended down over time (**Fig**  
717 **12**). Of importance, patients randomized to receive low or high dose vitamin C exhibited more rapid reductions  
718 in PCT and CRP levels than patients randomized to placebo, achieving significantly lower levels when  
719 compared to their own baseline by 48 hours ( $p < 0.05$ ). Thrombomodulin levels in patients randomized to  
720 placebo, though not different at baseline, began increasing, becoming significantly elevated beyond 36 hours  
721 remaining significantly elevated when compared to vitamin C treated patients (**Fig 13**). Vitamin C treated  
722 patients did not exhibit the increases in TM levels observed in placebo-infused patients. Our preliminary results  
723 suggest for the first time that vitamin C infusion produces early reductions in proinflammatory mediators in  
724 patients with severe sepsis. The results further suggest that vitamin C infusion

725  
726 **Summary of Preliminary Phase I Safety Studies in Human Sepsis:** During phase I human study/trial no  
727 untoward/adverse effects of intravenous vitamin C infusion were observed in any patient during the 96 hour  
728 treatment protocol. The preliminary data gathered suggests that vitamin C is capable of significantly altering  
729 the course of organ failure, which arises in humans following the onset of bacterial sepsis. Biomarker data also  
730 suggest that vitamin C infusion attenuates proinflammatory peptide expression, a process that contributes to  
731 sepsis mediated acute lung injury. Further, ascorbic acid infusion prevented subsequent increases in plasma  
732 thrombomodulin (an indicator of vascular injury).  
733

#### 734 1.4. Potential Mechanisms of Action of Ascorbic Acid in Sepsis

735

- 736 • Our experimental data in two murine models of sepsis induced lung injury suggest that vitamin C when  
737 infused acts in a pleotropic manner, attenuating NF $\kappa$ B inducible genes (chemokines, tissue factor) while  
738 boosting expression of genes leading to active fibrinolysis (i.e., tissue factor pathway inhibitor).
- 739 • Humans lack L-gulonolactone oxidase, the final enzyme in vitamin C biosynthesis.<sup>42</sup>
- 740 • Sodium-dependent vitamin C transporters move vitamin C into cells in reduced form or via facilitative  
741 glucose transporters in oxidized form as dehydroascorbic acid (DHA).<sup>43</sup> DHA is rapidly reduced and trapped  
742 intracellular as reduced vitamin C or L-ascorbic acid.
- 743 • Though vitamin C circulates in normal human plasma at 60-70 $\mu$ M, it accumulates normally in **millimolar**  
744 **concentrations in host defense cells (i.e., neutrophils, platelets, macrophages) and endothelium.**<sup>44</sup>  
745 Together with glutathione, vitamin C constitutes a primary line of defense against ROS and promotes  
746 recycling of other antioxidants (e.g., vitamin E).
- 747 • Subnormal plasma vitamin C concentrations in septic patients correlate inversely with multiple organ failure  
748 and directly with survival. Vitamin C depletion in sepsis results from: 1) ascorbate consumption by reduction  
749 of plasma free iron, 2) ascorbate consumption by the scavenging of aqueous free radicals, and 3) by  
750 destruction of DHA.<sup>45</sup> Sepsis associated vitamin C destruction permits uncontrolled oxidant activity.
- 751 • Clinical protocols currently in use for hospitalized septic patients are inadequate to normalize plasma vitamin  
752 C levels.<sup>46</sup>
- 753 • Ascorbate infusion into septic animals: 1) improves survival, corrects hypotension,<sup>47</sup> improves capillary blood  
754 flow,<sup>48</sup> protects endothelial barrier function,<sup>49</sup> attenuates peroxynitrite formation,<sup>50</sup> attenuates ALLI, and  
755 disrupts lung capillary microvascular thrombosis (see preliminary murine data above).  
756

#### 757 1.5. Ascorbic Acid Dose Selection

758

759 Dosing and bio-distribution data in humans show that pharmacological concentrations of vitamin C can only be  
760 attained following intravenous administration.<sup>51</sup> Dosage selection for this trial was determined both from animal  
761 modeling, examining the biological effectiveness in a lung injury model system and from the recently  
762 conducted randomized double blind phase I human sepsis safety trial. The 200 mg/kg/24 hour IV dosing  
763 protocol was determined from quantification of plasma ascorbate levels and from assessing the impact on  
764 SOFA scores. Further, the dosage was selected following observation of the 200 mg/kg/24 hour regimen on  
765 biomarker levels.  
766

## 1.6. Study Rationale

The purpose of this study is to assess the efficacy of intravenously infused ascorbic acid therapy for patients with sepsis associated ALI. By restricting the population to those we believe to have both infection and evidence for organ dysfunction (severe sepsis), this study targets a disease process and population that has been best studied in animal models and by a small RCT. By focusing on sepsis associated ALI, we have selected a group that has a higher disease burden than sepsis alone and thus likely to have both increased mortality and an increased opportunity for benefit, including a reduction in the requirement for mechanical ventilation. Given that the mortality and ventilator days are significant in patients with sepsis associated ALI, we believe there is real opportunity for improved clinical outcomes if the right interventional agent can be identified. In choosing the SOFA scores, and biomarkers of inflammation, vascular injury, and coagulation, as the primary outcomes, we will be able to detect changes in clinical outcomes that are important for proving proof of concept.

## 2. Objectives

### 2.1. Primary Objectives

To assess the efficacy of a 96-hour high dose intravenous vitamin C infusion protocol (200 mg/kg per 24 hours) in patients with established ALI/ARDS that results from severe sepsis. Patients will be randomized to receive either: 1) **Placebo** (50 ml of 5% dextrose in water) or **Vitamin C** (sterile L-ascorbic acid for injection at 200 mg/kg per 24 hours with entire calculated 24 hour dose diluted in 200 ml of 5% dextrose in water). One fourth of the 24 hour calculated dosage will be administered in 30 minute intravenous infusions will occur every 6 hours.

Clinical, physiological, and biomarker data will be collected at various time points while on study (See Appendix G). All data collected below will occur at the following timepoints: hour 0 (collected within the 24 hours prior to randomization, or post randomization, but pre-infusion), hour 48 (a timepoint prior to infusion 9), 96 (a timepoint close to hour 96 and after infusion 16), hour 168 (a timepoint close to hour 168)

- VS (Body weight, blood pressure, heart rate, Temperature, mean arterial pressure, oxygen saturation, central venous pressure, glasgow coma score)
- Vasopressor use (amount and type) (mcg/kg/min)
- Ventilator data – Is the patient on or off vent?
  - ✓ If on mechanical ventilation: Mean Airway Pressure, tidal volume, Peak Inspiratory Pressure, FiO<sub>2</sub>, Respiratory Rate, Plateau Pressure, Positive End Expiratory Pressure (data recorded from chart at the 8am time point or closest time point to 8am available)
- Arterial Blood Gases: pH, PaO<sub>2</sub>, PaCO<sub>2</sub>, SpO<sub>2</sub> - for as long as subject has arterial line
- Laboratory (Sodium, Potassium, Chloride, Metabolic Glucose, Hemoglobin, Hematocrit, Platelets, White Blood Cell Count, Creatinine, Blood Urea Nitrogen, Bilirubin (data recorded from chart at the 8am time point or closest time point to 8am available).
- Biomarker blood sample
- **Sequential Organ Failure Assessment Score (SOFA)**: (if intubated use PaO<sub>2</sub>/FiO<sub>2</sub> ratio for calculation. If not intubated see Appendix H for calculating FiO<sub>2</sub> and PaO<sub>2</sub>/FiO<sub>2</sub> from SpO<sub>2</sub>. Calculate using the worst value in the 24 hours preceding the Score time point for each component. See Appendix G for Modified SOFA Score Calculator.

## 2.2. Hypothesis

**Hypothesis 1A:** Vitamin C infusion will significantly attenuate sepsis associated systemic organ failure as measured by Sequential Organ Failure Assessment (SOFA) score,

**Hypothesis 1B:** Vitamin C infusion will attenuate sepsis associated lung injury as assessed by the oxygenation index and the VE40

**Hypothesis 1C:** Vitamin C infusion will attenuate biomarkers of inflammation (C-Reactive Protein, Procalcitonin), vascular injury (Thrombomodulin, Angiopoietin-2), alveolar epithelial injury (Receptor for Advanced Glycation End Products), while inducing the onset of a fibrinolytic state (Tissue Factor Pathway Inhibitor).

## 3. End-Points

Analysis of the primary, secondary and other endpoints will be conducted on an intention-to- treat (as randomized) basis.

### 3.1. Primary Endpoints

**Primary Endpoint #1:** Change in SOFA score at 96 hours as compared to baseline when compared to placebo.

**Primary Endpoint #2:** C-Reactive Protein and Thrombomodulin at study hours 0, 48, 96, 168 when compared to placebo.

**Explanation For The Choice of Primary Endpoints:** The phase I trial was a safety trial and numbers of patients studied were small. The SOFA score was chosen as the "**physiological primary endpoint**" due to the prompt and significant reductions in the SOFA score observed in the high dose vitamin C group. The SOFA score, though not a primary lung function score, contains the PaO<sub>2</sub>/FiO<sub>2</sub> ratio in its calculation. We have chosen C-Reactive Protein and Thrombomodulin as broad indicators of inflammation and vascular injury to serve as the primary endpoint biomarkers.

### 3.2. Secondary End Points

#### Secondary Endpoints:

- Oxygenation Index (FiO<sub>2</sub> x Mean Airway Pressure/PaO<sub>2</sub>) at study hour 0, 48, 96, 168 if still intubated in ascorbate infused patient compared to placebo.
- VE-40 (Vent RR x TV/Weight) x (PaCO<sub>2</sub>/40) at study hour 0, 48, 96, 168 if still intubated, in ascorbate infused patient compared to placebo
- SOFA scores at hours 48, 96, 168
- SOFA Score Components at hours 48,96, 168
  - PaO<sub>2</sub>/FiO<sub>2</sub>
  - SpO<sub>2</sub>/FiO<sub>2</sub>
  - Platelets
  - Total Bilirubin
  - Vasopressor status
  - GCS
  - Creatinine or Urine Output
- Angiopoietin-2, Procalcitonin, Receptor for Advanced Glycation End Products, Tissue Factor Pathway Inhibitor at study hour 0, 48, 96, 168
- Ascorbate level at hour 0, 48, 96, 168
- Ventilator Free Days to day 28

- ICU-free days at day 28
- All cause mortality to day 28
- Hospital-free days at day 60

VE40 is a bedside pulmonary dead-space calculation and is defined as the minute ventilation needed to bring PaCO<sub>2</sub> to 40 mm Hg.<sup>52</sup> Ventilator Free Days or VFDs to day 28 are defined as the number of days from the time of initiating unassisted breathing to day 28 after randomization, assuming survival for at least two consecutive calendar days after initiating unassisted breathing and continued unassisted breathing to day 28. If a patient returns to assisted breathing and subsequently achieves unassisted breathing to day 28, VFDs will be counted from the end of the last period of assisted breathing to day 28. A period of assisted breathing lasting less than 24 hours and for the purpose of a surgical procedure will not count against the VFD calculation. If a patient was receiving assisted breathing at day 27 or dies prior to day 28, VFDs will be zero. Patients transferred to another hospital or other health care facility will be followed to day 28 to assess this endpoint. ICU- and Hospital-free days to day 28 and day 60 are defined as the number of days alive between day 1 and day 28 and day 1 and day 60 which were spent outside the ICU or outside of the hospital respectively.

### 3.3. Focused Safety Analysis:

The current trial will be enrolling patients with sepsis associated acute lung injury. We therefore expect that many of these patients will have some degree of organ dysfunction.

#### 3.3.1 Renal Monitoring Plan

Patients with sepsis are at high risk of metabolic acidosis (including lactic acidosis). To prevent the possibility of metabolic acidosis due to drug administration, the study drug is formulated to a neutral pH of 7.4. Therefore, we do not anticipate the need for additional monitoring of acid/base balance beyond standard-of-care provided at each institution. Any observed abnormalities will be evaluated according to standard-of-care practice and documented in the research record.

#### 3.3.2 Glucose Monitoring Plan

Guidance for blood glucose monitoring in patients enrolled in the CITRIS-ALI Trial:

Ascorbic acid is known to artefactually **raise** POC blood glucose readings by all POC devices except the StatStrip glucometer. However, it does not raise blood glucose readings from a basic metabolic panel or glucose results using the gas lab. Thus, extreme care must be taken to assure an accurate blood glucose level from a metabolic laboratory (BMP) or arterial blood gas panel before initiating any insulin therapy, including sliding scale or scheduled insulin.

All study sites not using the StatStrip POC glucometer should follow these guidelines:

Guidance for blood glucose monitoring in patients enrolled this study:

- Critical care Nursing and Physician leadership at all study sites must be informed of vitamin C's effect on point of care (glucometer) blood glucose and arterial blood gas glucose point of care values.
- In-service training will be documented in the Study Training Log
- Bold signage will be displayed on all study instructions, data collection forms, and at the patient's head of bed, stating:
  - STOP! Do not use Accucheck or other Point of Care devices to measure glucose on this patient
  - Use only metabolic or gas lab glucose screening methods
  - This patient is enrolled in a study with Vitamin C, which artefactually increases POC glucose testing

- 908 ➤ Do Not Initiate or Utilize Sliding Scale, Scheduled Insulin, or Continuous Insulin Infusion Without  
909 Laboratory Confirmation of Blood Glucose

- 910 • Those receiving insulin infusion or sliding scale insulin will have metabolic glucose screening on the  
911 schedule determined by the primary physician and paid for by the study  
912 • Blood glucose monitoring for insulin administration guidance should *only* be by a metabolic or blood  
913 gas laboratory measured blood glucose results, whether or not the study patient is receiving insulin  
914 • Study personnel will follow each study patient closely to monitor insulin use to ensure that point of  
915 care glucose screening is suspended for the research subject.  
916 • If subject loses central venous access (PICC line and arterial line acceptable), Vitamin C infusions  
917 are to stop but subject not withdrawn. Data collected through end of study.  
918 • Point of care glucose testing may resume 36 hours after the last infusion of study drug.

919 **4. Study Population and Enrollment**

920 **4.1. Number/Source/Screening**  
921

922 The trial will accrue a maximum of 170 patients over a 2-3 year period. Patients with sepsis associated ALI  
923 will be recruited from intensive care units at Virginia Commonwealth University Health System, Medical  
924 College of Wisconsin and sub-site, Aurora St. Luke's Medical Center, The Cleveland Clinic Health System  
925 and its sub-site, Fairview Hospital. Study personnel will review patients within intensive care units daily to  
926 identify potential candidates for enrollment. Permission to approach patients and/or their families will be  
927 requested from the attending physicians in charge of patient care in the ICU. All patients meeting the  
928 inclusion/exclusion criteria will be approached with a consent and will be entered into a screening log. If the  
929 patient is not enrolled, the screening log will include information explaining why enrollment did not occur  
930 (exclusion criteria, attending physician denial, patient refusal, etc.).  
931

932 Patients will be documented in the Study Screening Log when all Inclusion Criteria are met. A Screen  
933 Failure is defined as a patient meeting all Inclusion Criteria but not meeting Exclusion Criteria.

934 **4.2. Inclusion Criteria**

935 **4.2.1 CITRIS-ALI Inclusion Criteria:**

936 **CITRIS-ALI Inclusion Criteria:**

937 Patients must have suspected or proven infection, and meet 2 out of 4 of the criteria for Systemic Inflammatory  
938 Response (SIRS) due to infection, and be accompanied by at least 1 criterion for sepsis associated organ  
939 dysfunction, *and* meet all 5 criteria for Acute Respiratory Distress Syndrome (ARDS).

- 940 1. Suspected or proven infection: (e.g., thorax, urinary tract, abdomen, skin, sinuses, central venous  
941 catheters, and central nervous system, see Appendix A).  
942 2. The presence of a systemic inflammatory response: Defined as: *fever*: >38°C (any route) or  
943 *hypothermia*: <36°C (core temp only), *tachycardia*: heart rate > 90 beats/min or receiving medications  
944 that slow heart rate or paced rhythm, *leukocytosis*: >12,000 WBC/ $\mu$ L or *leukopenia*: <4,000 WBC/ $\mu$ L  
945 or >10% band forms. Respiratory rate > 20 breaths per minute or PaCO<sub>2</sub> < 32 or invasive mechanical  
946 ventilation.  
947 3. The presence of sepsis associated organ dysfunction: (any of the following thought to be due to  
948 infection)  
949 a. Sepsis associated hypotension (systolic blood pressure (SBP) < 90 mm Hg or an SBP decrease  
950 > 40 mm Hg unexplained by other causes or use of vasopressors for blood pressure support  
951 (epinephrine, norepinephrine, dopamine  $\geq$  5mcg, phenylephrine, vasopressin)  
952 b. Arterial hypoxemia (PaO<sub>2</sub>/FiO<sub>2</sub> < 300) or supplemental O<sub>2</sub> > 6LPM.  
953 c. Lactate > upper limits of normal laboratory results  
954 d. Urine output < 0.5 ml/kg/hour for > two hours despite adequate fluid resuscitation

- 955 e. Platelet count < 100,000 per mL  
956 f. Coagulopathy (INR > 1.5)  
957 g. Bilirubin > 2 mg/dL  
958 h. Glasgow Coma Scale < 11 or a positive CAM ICU score  
959 4. ARDS characterized by all the following criteria  
960 a. Lung injury of acute onset, within 1 week of an apparent clinical insult and with progression of  
961 respiratory symptoms  
962 b. Bilateral opacities on chest imaging not explained by other pulmonary pathology (e.g. pleural  
963 effusions, lung collapse, or nodules)  
964 c. Decreased arterial PaO<sub>2</sub>/FiO<sub>2</sub> ratio ≤ 300 mm Hg  
965 e. Minimum PEEP of 5 cmH<sub>2</sub>O  
966

#### **CITRIS-ALI Exclusion Criteria:**

- 967 1. Known allergy to Vitamin C  
968 2. inability to obtain consent;  
969 3. age < 18 years;  
970 4. Not on a ventilator  
971 5. No indwelling venous or arterial catheter in patients requiring insulin in a manner that requires glucose  
972 being checked more than twice daily (e.g. continuous infusion, sliding scale)  
973 6. Presence of diabetic ketoacidosis  
974 7. more than 48 hrs since meeting ARDS criteria;  
975 8. patient or surrogate or physician not committed to full support (not excluded if patient would receive all  
976 supportive care except for cardiac resuscitation);  
977 9. pregnancy or breast feeding,  
978 10. moribund patient not expected to survive 24 hours;  
979 11. home mechanical ventilation (via tracheotomy or noninvasive) except for CPAP/BIPAP used only for  
980 sleep-disordered breathing;  
981 12. on home O<sub>2</sub> > 2LPM, except for with CPAP/BIPAP  
982 13. diffuse alveolar hemorrhage (vasculitis);  
983 14. interstitial lung disease requiring continuous home oxygen therapy;  
984 15. Active kidney stone  
985 16. Non English speaking;  
986 17. Ward of the state (inmate, other)  
987  
988

#### **4.3. Enrollment, Randomization, and Study Initiation Time Window**

989 All ALI criteria (4.2.3 a-d above) must occur within the same 24-hour period. The onset of ALI is when the  
990 last criterion is met. Patients must be consented within 48 hours of ALI onset. SIRS criteria must occur  
991 within the 48 hours before and 24 hours after ALI onset. Information for determining when these time  
992 window criteria were met may come from either the study hospital or a referring hospital report.  
993 Randomization must occur within the same 48 hours of ALI onset, as is for consent. Dose 1 must be  
994 administered within 6 hours of randomization. Following randomization, the low tidal volume protocol for  
995 mechanical ventilation (Appendix C) and the fluid management strategy protocol (Appendix D) may be  
996 initiated within one and four hours respectively (if not already being utilized), if clinically indicated.  
997  
998  
999

#### **4.4. Informed Consent**

000 Informed consent will be obtained from each patient or surrogate (family or legal representative) before  
001 enrollment in the trial. No study procedures will be conducted before obtaining informed consent.  
002  
003

#### 4.5. Randomization

After informed consent is given, a randomized assignment will be made by the *Investigational Pharmacy* of the Lead Site and Coordinating Center (VCUHS) to administer either Vitamin C therapy or placebo. Each participating pharmacy will have a pre-defined randomization chart by which to

|                  | Atlanta | Cleveland | Charlottesville | Richmond | Average |
|------------------|---------|-----------|-----------------|----------|---------|
| Female           | 50.2%   | 53.0%     | 52.3%           | 52.3%    | 52.1%   |
| Male             | 49.8%   | 47.0%     | 47.7%           | 47.7%    | 47.9%   |
| Hispanic         | 5.2%    | 14.7%     | 5.1%            | 8.3%     | 7.8%    |
| Not Hispanic     | 94.8%   | 85.3%     | 94.9%           | 93.7%    | 92.2%   |
| American Indian  | 0.2%    | 0.4%      | 0.3%            | 0.3%     | 0.3%    |
| Asian            | 3.1%    | 2.0%      | 6.4%            | 2.0%     | 3.4%    |
| Native Hawaiian  | 0.1%    | 0.1%      | 0.1%            | 0.1%     | 0.1%    |
| African American | 54.0%   | 34.7%     | 19.4%           | 50.6%    | 39.9%   |
| White            | 38.4%   | 51.2%     | 69.1%           | 40.0%    | 50.0%   |

\*Source: United States Census Bureau (<http://2010.census.gov/2010census>)

determine whether to administer the study drug or placebo to each particular subject. The randomization will be stratified by institution to one of the two study arms.

#### 4.7. Minorities and Women

The demographic profiles of the Centers selected for the study show that the aggregate patient population contains representative proportions of minorities and women (Table 1). Recruitment of minorities and women will be monitored by the Study Coordinating Center. If necessary, additional recruitment efforts will be made at specific centers to ensure that the aggregate patient sample

contains appropriate gender and minority subsets. Pregnant women will be excluded because of the lack of safety data for infused Vitamin C use during pregnancy.

#### 5. Study Procedures

If a pregnancy test is not available before informed consent, blood or urine tests will be obtained after informed consent but before randomization to ensure eligibility. Patients excluded on the basis of tests obtained in this manner will not be included in the study.

##### 5.1. Vitamin C or Placebo Administration

All study drug doses will be administered via central or peripheral line infusion. Should no central or peripheral line be available at scheduled time of infusion, a call should be placed to pharmacy to determine if study drug may be piggybacked into the line that is infusing a different drug. If administering study drug via piggyback is contraindicated then study drug infusion may be delayed by a maximum of 6 hours. If clinical drug administration schedule is such that study drug will not have an available administration time beyond this delay, a dedicated new line (peripheral or central) should be inserted. Study drug will be blinded using an identical appearing placebo.

The prepared IV bags will have the IV tubing attached and primed by the study pharmacist. Amber shrouding will be used to cover the IV bag and the IV tubing in order to maintain the blind. The product labeling will be blinded as to what the actual product is. For example, the drug name and dose will be indicated as per the following: "Ascorbic acid \_\_\_\_mg or placebo in 50cc D5W".

1. **First study drug dose** (L-ascorbic acid or placebo) will be considered "Dose 1" and will be administered within 6 hours of randomization or the earliest available time post any clinically indicated procedure which requires the patient to be off the unit. All doses will be administered in the ICU. Patients receiving vitamin C will receive 25% of the total daily calculated dosing (200mg/kg/24 hours) and will be infused over 30 minutes for this first dosing.
2. **Subsequent doses** which represent 25% of the day's total dose will be infused every six hours through 96 hours (+/- 3 hours).



- 053 a. Timing of Dose 2 will be triggered by the physician order for q 6 hour administration and will  
054 therefore be listed on the bedside MAR. As such, timing of Dose 2 may be out of the +/- 3  
055 hour window and will not trigger a protocol deviation.  
056 b. If for any reason any other maintenance dose is not administered within window, the dose will  
057 be skipped and the next scheduled dose will be given and documented in the data collection  
058 tool.  
059

## 060 5.2. Drug Level Specimens (venous blood)

061 Preliminary studies performed during the phase I trial showed that an every 6 hour infusion protocol  
062 resulted in steady state plasma levels after 18 hours. In this phase II trial, plasma levels of Vitamin C will be  
063 obtained to determine the relationship, if any, of plasma levels to either the pleiotropic effects or the  
064 toxicities of Vitamin C or to biomarker levels.  
065  
066

## 067 5.3. Completion of Study Drug Administration

068 **Completion of study drug administration:** Study drug administration will be stopped when one of the  
069 following conditions is met, whichever comes first:  
070

- 071 1. Final drug dose at 96 hours or discharge from ICU, whichever comes first.
- 072 2. Discharge from study hospital
- 073 3. Loss of indwelling venous or arterial catheter with no intent to replace the line, making it impossible to  
074 monitor glucose levels via central laboratory without multiple peripheral sticks.
- 075 4. Withdrawal from study
- 076 5. Death  
077

078 **Note:** If a patient is readmitted to the ICU after study drug has already been stopped per protocol, it does  
079 **NOT** get restarted when readmitted to the ICU.

## 080 5.4. Premature Withdrawal from Treatment

081 Loss of indwelling venous or arterial catheter will trigger the stopping of Vitamin C infusions but subjects will  
082 remain on study. Blood glucose monitoring will continue via the central laboratory for 36 hours after the last  
083 infusion via peripheral IV draws or peripheral sticks. Biomarker sampling via peripheral IV and/or peripheral  
084 stick is allowable as it occurs only 4 times throughout the study and likely only once (if at all) after the patient  
085 has been discharged from the unit and is without a central line.  
086  
087

088 The study drug will be discontinued if a patient develops a metabolic acidosis unexplained by other  
089 etiologies (lactic acidosis secondary to septic shock). Determination of the presence of metabolic acidosis  
090 will be made by the site investigator. Study drug will also be discontinued if primary care team or surrogate  
091 decision maker request withdrawal. Data collection will continue on these patients following withdrawal of  
092 study drug.  
093

094 Requests to unblind a patient's study treatment can be made to the study (investigational) pharmacist.  
095 Unblinding study treatment should occur only in the case of an emergency when knowledge of the study  
096 treatment is essential for subject care to treat a serious adverse event and prevent further harm or death.

097 If possible, a decision to unblind should be discussed with the Principal Investigator or a sub-Investigator prior  
098 to unblinding the study treatment.

099 If a blind is broken (*either intentionally or unintentionally*), the circumstances should be documented as  
100 to who, what, when, and why and all documentation shall be kept by the study pharmacist.  
101

## 5.5. Ventilator Procedures

Ventilator management, including weaning, will follow the modified ARDS Network lower tidal volume (6 ml/kg PBW) protocol (Appendix C).<sup>53</sup> If not already being utilized, this low tidal volume protocol for mechanical ventilation will be initiated within one hour of randomization, if possible. Since the time a patient achieves unassisted ventilation affects the secondary endpoint of ventilator free days (VFDs), and because recent evidence-based consensus recommendations have identified a best practice for weaning, weaning strategy will also be controlled by protocol rules in accordance with these evidence-based recommendations. This will assure similar weaning methods. This newer weaning strategy is a simplified version of the weaning strategy used in prior ARDS Network study protocols (see Appendix C).

## 5.6. On-Study Fluid Management

Fluid management during shock will not be prescribed per study protocol. In subjects who are not in shock, a conservative fluid management approach will be administered, if possible. This conservative fluid management approach will represent a simplification of the algorithm utilized in the ARDS Network FACTT study (see Appendix D).<sup>54</sup> If not already being utilized, this conservative fluid management approach will be initiated, if possible, within four hours of randomization and continued until the subject has reached unassisted breathing (UAB) or study hour 168, whichever occurs first.

## 6. Data Collection

### 6.1. Background Assessments

1. Demographic:
  - a. Gender
  - b. Age
  - c. Race/Ethnicity
2. Insurance status
  - a. Privately insured
  - b. Medicaid
  - c. Medicare
  - d. Other public
  - e. uninsured
3. Pertinent Medical History and Physical Examination
  - a. Etiology of Sepsis
  - b. diabetic status – Hx of Diabetes  Yes  No
    - i. Insulin received?  Yes  No
  - c. patient place of residence: Home independently, home with help (supervision, direction, personal assistance), home with professional help (nursing/nursing service), intermediate care or rehab facility, skilled nursing facility, other (specify)
  - d. Patient admitted directly from: OR, Recovery Room, ER, Floor, another special care unit, another hospital, direct admit, step-down unit
  - e. Hx of alcohol use via the AUDIT-C Questionnaire:
    - i. How often do you have a drink containing alcohol?  
 Never  
 Monthly or less  
 2-4 times per month

150  
151  
152  
153  
154  
155  
156  
157  
158  
159  
160  
161  
162  
163  
164  
165  
166  
167  
168  
169  
170  
171  
172  
173  
174  
175  
176  
177  
178  
179  
180  
181  
182  
183  
184  
185  
186  
187  
188  
189  
190  
191  
192  
193  
194  
195

- 2-3 times per week
- 4 or more times per week
- ii. How many standard drinks containing alcohol do have on a typical day?
  - 1 or 2
  - 3 or 4
  - 5 or 6
  - 7 to 9
  - 10 or more
- iii. How often do you have six or more drinks on one occasion?
  - Never
  - Less then monthly
  - Monthly
  - Weekly
  - Daily or almost daily

- 4. Study enrollment date
- 5. Acute or Chronic renal failure and use of dialysis

## 6.2. Baseline/Hour 0 Assessments and Procedures

The following information will be recorded during the 24 hour interval preceding randomization. If more than one value is available for this 24 hour period, the value closest to the time of randomization will be recorded. If no values are available from the 24 hours prior to randomization, then values will be measured post randomization but prior to initiation of study drug.

- Vital Signs: Blood Pressure (BP), Heart Rate (HR), Mean Arterial Pressure (MAP), Respiratory Rate (RR), Temperature., O<sub>2</sub> saturations, Central Venous Pressure (CVP), Body weight, Glasgow Coma Score
- Suspected or known site of sepsis
- SOFA Score
- $V_{E40} = [\text{Minute Ventilation} \div \text{Weight (kg)}] \times [\text{PaCO}_2 \div 40]$  – closest one to time of randomization
- Oxygenation Index =  $[\text{FiO}_2 \times \text{Mean Airway Pressure}] \div \text{PaO}_2$
- Ventilator Data: tidal volume, FiO<sub>2</sub>, PEEP, inspiratory plateau pressure, Peak Inspiratory Pressure, and mean airway pressures.
- Arterial Blood Gasses: PaO<sub>2</sub>, PaCO<sub>2</sub>, pH, HCO<sub>3</sub> and SpO<sub>2</sub>
- Serum Sodium, Potassium, Metabolic Glucose, BUN, Creatinine, Billirubin Total, WBC, Hgb, Hct, Platelets, PT/INR
- Vasopressors or inotropes (epinephrine, norepinephrine, phenylephrine, vasopressin, dopamine)
- Insulin received?  Yes  No
- In/Out – total – for first 7 days or for every day in ICU, whichever is shorter
- In/Out – Urine - for first 7 days or for every day in ICU, whichever is shorter
- Concomitant Medications: use of steroids
- Blood for biomarkers will equal approximately 12ml. Blood samples will be processed and divided per the Laboratory Instructions Manual

## 6.3. Assessments after Enrollment

The following data will provide the basis for assessing protocol compliance and safety as well as between-

199 group differences in several efficacy variables. Data for each of the variables will be recorded on the days  
200 shown in the Time-Events schedule (Appendix E) or until death or discharge from the intensive care unit.  
201  
202

| Hours:                                                                                          | Required:                                                                                                                                                                                  |
|-------------------------------------------------------------------------------------------------|--------------------------------------------------------------------------------------------------------------------------------------------------------------------------------------------|
| Q 24 hours for as long as patient is in ICU or 7 days (whichever comes first)<br>0, 48, 96, 168 | I/O Total<br>I/O Urine<br>Insulin Receipt<br><br>VS, SOFA, ABGs, Routine Labs, Con Meds, AE/SAE Assessments, Blood draw for Biomarkers, Insulin Receipt                                    |
| 28 Days                                                                                         | As Available:<br>VE40, OI, Weight, Bilirubin, Ventilator Data, known site of sepsis<br>Required:<br>Ventilator Free Days to Day 28, All-Cause Mortality to Day 28, ICU Free Days to Day 28 |
| 60 Days                                                                                         | Use of dialysis<br>Hospital Free Days at Day 60                                                                                                                                            |

### Reference Measurements

All data collected below will occur at the following timepoints: hour 0 (collected within the 24 hours prior to randomization, or post randomization, but pre-infusion), hour 48 (a timepoint prior to infusion 9), 96 (a timepoint close to hour 96 and after infusion 16), hour 168 (a timepoint close to hour 168)

1. Ventilator Data - The following conditions will be ensured prior to measurements: no endobronchial suctioning for 10 minutes; no invasive procedures or ventilator changes for 30 minutes.
2. Arterial Blood Gases when Arterial line is in place for clinical reasons
3. Vital Signs
4. Labs
5. Vasopressor
6. Use of Steroids
7. Blood samples for biomarkers.

Blood specimens will be batch-sent to the VCU Central Repository to be stored. Specimens will be identified by a unique number. All data released by the Clinical Coordinating Center for studies will be linked to the specimen but will be de-identified. Plasma collected for this trial will be frozen and stored at the VCU bio-repository for future research.

## 7. Statistical Considerations

### 7.1. Statistical Methods

***CITRIS-ALI Data Analysis Plan:*** We plan to enroll 170 patients in the CITRIS-ALI study (85 per group) to allow for the possibility of approximately 10% dropouts. The projected sample size for this study (n =170) should provide adequate power to detect an absolute 2 point difference on the average SOFA scores between the two study groups (13 vs. 11) with an average SD of 4.6. This will provide an alpha level of 0.05 and a

power of 80%. Effects will be reported with a point estimate and 95% confidence intervals in addition to p-values. We will examine the distributions of all measures and identify possible outliers; outliers will be thoroughly checked for collection or data entry errors before being used in the analysis. All hypotheses will be tested and data analysis will be done using a variety of statistical methods with the most common method expected to be a *Mixed Linear Model* (MLM) for continuous repeated measures. To assess the effect of the treatment on continuous outcome measures that repeat over time the MLM<sup>55,56</sup> will be used to fit a series of repeated measures ANOVA (RMANOVA) models. These models will have one between subject factor (Group; Placebo, Hi-VitC), one within subject factor (Time; Baseline, 12 hours, 24 hours, 36 hours, 48 hours, 72 hours, 96 hours, 7 days) and the interaction between “Group and Time.” The Group by Time interaction term will allow us to test the hypothesis that the difference between the treatment groups is the same over time. The MLM that will be used for these analyses differs from the usual general linear model (i.e. ANOVA) in two ways. The MLM allows for the inclusion of both fixed and random effects at the same time and thus allows for the complete analysis of repeated measures designs. Second, observations in the MLM are not required to be independent, as is the case with ANOVA, so that correlated observations that arise from repeated measurements made on the same subjects can be accommodated. For the repeated within subjects measures, a variety of variance-covariance structures will be evaluated to determine which provides the best fit to the observed data. Further, MLMs do not require complete repeated measurements data on all subjects when used to estimate the course of the outcome variable over time. Incomplete or missing data are handled by the model, providing that the missing data are assumed to be “missing at random.”<sup>57</sup> While it is expected that the randomization process will prevent any group differences with respect to factors that could impact the outcome measures we can also fit models that include these measures as additional covariates to determine whether any *Group by Time* interactions remain significant. **Early Stopping:** An early stopping determination will be made by the Data Safety Monitoring Board

**Power Estimates Sample Size Calculation:** The primary goal of this study is to examine the efficacy of vitamin C infusion on organ failure and selected biomarkers. We have chosen the co-primary variables of (1) SOFA score, (2) plasma c-reactive protein and (3) thrombomodulin. The sample size for the proposed study was calculated using observed organ failure data and the biomarker analyses from the phase I clinical trial at VCU. Using data from two biomarkers and the SOFA scores, a power/sample size calculation was conducted. Using the RMANOVA model and assuming an alpha level of 0.05, and using a Holm-Bonferroni correction to accommodate the multiple tests, the following table shows the required sample sizes to detect a significant Group by Time interaction effect at 96 hours.

| 1260<br>Power Estimates for a variety of samples sizes, $\alpha=0.05$ significance level, for multiple primary endpoints using the Holm-Bonferroni Correction |                 |          |          |          |          |           |
|---------------------------------------------------------------------------------------------------------------------------------------------------------------|-----------------|----------|----------|----------|----------|-----------|
|                                                                                                                                                               | Empirical Power |          |          |          |          |           |
|                                                                                                                                                               | 75/Group        | 80/Group | 85/Group | 90/Group | 95/Group | 100/Group |
| Co-Primary Variables:<br>SOFA, CRP, TM                                                                                                                        | 77%             | 77%      | 80%      | 80%      | 82%      | 83%       |

1260  
to accommodate the multiple tests, the following table shows the required sample sizes to detect a significant Group by Time interaction effect at 96 hours.

**Subgroup Analyses from data at enrollment:** Shock presence or absence

**8. Data Collection and Site Monitoring**

**8.1. Data Collection**

Research coordinators will collect data and enter it directly into the web-based data entry system managed by the Clinical Coordinating Center and record on paper data forms. Data will be transferred to the Clinical Coordinating Center on a prescribed basis through a web-based data entry program.

## 8.2. Site Monitoring

Remote monitoring will be used and augmented with site visits performed by a contracted monitoring service to ensure that all regulatory requirements are met and to monitor the quality of the data collected. Records of *Institutional Review Board* approvals and patients' charts will be examined on a spot check basis to evaluate the accuracy of the data entered into the database.

## 9. Risk Assessment

### 9.1. Risks of Active Study Drug

**Intravenous Ascorbic Acid Infusion:** High dose ascorbic acid therapy is a powerful anti-oxidant and micronutrient and a safe therapy in normal subjects and in critically ill patients.<sup>58</sup> Muhlhofer and colleagues examined for the presence of adverse effects following intravenous infusion of 7500 mg Ascorbic Acid daily for 6 days in normal subjects (n=6). No abnormalities in laboratory analysis (fasting state; hemoglobin, leukocytes, platelets, sodium, potassium, calcium, chloride, glucose, creatinine, urea, bilirubin, ALT, AST, ggGT, alkaline phosphatase, and prothrombin time) were found. Nathens et al infused high dose ascorbic acid (1500 mg three times daily) into critically ill surgical patients for 28 days and found no serious adverse events.<sup>59</sup> Hoffer et al infused dosages as high as 1.5 grams/kg body weight three times weekly into patients with advanced cancer.<sup>60</sup> Adverse events were infrequent consisting of nausea, vomiting, dizziness, and headache. A systematic review conducted by Hans K. Biesalski<sup>61</sup> on the safety of the long term low dose parenteral administration of ascorbic acid in patients on haemodialysis revealed it to be safe with frequent monitoring of oxalate following dialysis. Finally, in the safety study conducted here at VCU testing the safety of infusing high doses of ascorbic acid in patients with sepsis, in which approximately 8 of 24 subjects were receiving dialysis, no adverse events occurred that could be related to the ascorbic acid.

**Potential Physical Risks of Ascorbic Acid Infusion:** As noted above, the risks associated with ascorbic acid infusion are few. Potential risks include: dry mouth, nausea, vomiting, dizziness, headache.

**Potential Psychological, Social, Legal Risks of Ascorbic Acid Infusion:** No psychological, social or legal risks are identifiable from an extensive literature search. The recently completed phase I trial: **Vitamin C (Ascorbic Acid) Infusion in Human Sepsis** where up to 16 grams of ascorbic acid was infused daily for 4 days identified no further risk that that identified.

### 9.2. Risks of Blood Draws

All patients will have blood drawn for research purposes. Most blood will be drawn through indwelling catheters. Risks of drawing blood percutaneously are uncommon and include bleeding and bruising.

### 9.3. Minimization of Risks

Federal regulations at 45 CFR 46.111(a) (1) requires that risks to subjects are minimized by using procedures which are consistent with sound research design. There are several elements of study design in the present protocol that meets this human subject protection requirement.

Exclusion criteria prohibit participation of patients who might be at increased risk from the effects Vitamin C. Additionally, no adverse events occurred during the pilot study found to be related to the study drug. Finally, vigilant clinical monitoring is standard of care for ICU patients.

## 9.4. Potential Benefits

Most observational studies suggest a mortality benefit from prior or in-patient Vitamin C use after hospitalization for serious infections. None of the observational trials have reported significant Vitamin C-related toxicity. An animal model of acute lung injury with intravenous LPS and feces induced peritonitis demonstrate significantly less lung injury with Vitamin C, which may result in shortening the time patients require mechanical ventilation.

## 9.5. Risks versus Benefits

The identifiable risks arising from exposure to intravenous ascorbic acid infusion are low. In our preliminary data, we extensively outlined the potential benefits brought by attenuation of acute lung injury and organ failure associated with bacterial sepsis. Given the low risk associated with ascorbic acid infusion and the potential high likelihood of benefit we assess the risk/benefit ratio to be low (i.e., that benefit far outweighs risk).

## 10. Human Subjects

Each study participant or a legally authorized representative must sign and date an informed consent form. Institutional review board approval will be required before any subject is entered into the study.

### 10.1. Selection of Subjects

Screening for patients to be enrolled in the CITRIS-ALI trial will occur in the ICUs at VCU Health System, The Medical College of Wisconsin and sub-site, Aurora St. Luke's Medical Center, The Cleveland Clinic and its sub-site, Fairview Hospital.

#### 10.1.1. Equitable Selection of Subjects

Federal regulations at 45 CFR 46(a)(3) require the equitable selection of subjects. The ICUs will be screened to determine if any patient meets the inclusion and exclusion criteria. Data that have been collected as part of the routine management of the subject will be reviewed to determine eligibility. No protocol-specific tests or procedures will be performed as part of the screening process. If any subjects meet criteria for study enrollment, then the attending physician will be asked for permission to approach the patient or his/her surrogate for informed consent. Justifications of exclusion criteria are given in Section 4.3. These exclusion criteria neither unjustly exclude classes of individuals from participation in the research nor unjustly include classes of individuals from participation in the research. Hence, the recruitment of subjects conforms to the principle of distributive justice.

#### 10.1.2. Vulnerable Subjects

The present research aims to investigate the safety and efficacy of a type of treatment for patients with ALI and ARDS secondary to severe sepsis. No vulnerable subjects will be entered into this phase II trial.

## 10.2. Informed Consent

Federal regulations 45 CFR 46.111(a)(5) require that informed consent will be sought from each prospective subject or the subject's legally authorized representative. The investigator is responsible for ensuring that the patient or patient's legal representative understands the risks and benefits of participating in the study,

376 and answering any questions the patient may have throughout the study and sharing any new information in  
377 a timely manner that may be relevant to the patient's or the legal representative's willingness to continue his  
378 or her participation in the trial. All study participants or their surrogates will be informed of the objectives of  
379 the study and the potential risks. The informed consent document will be used to explain the risks and  
380 benefits of study participation to the patient in simple terms before the patient is entered into the study, and  
381 to document that the patient is satisfied with his or her understanding of the risks and benefits of  
382 participating in the study and desires to participate in the study. The investigator is responsible for ensuring  
383 that informed consent is given by each patient or legal representative. This includes obtaining the  
384 appropriate signatures and dates on the informed consent document prior to the performance of any  
385 protocol procedures and prior to the administration of study agent.  
386  
387

### 388 10.3. Identification of Surrogates 389

390 Many of the patients approached for participation in this research protocol will have limitations of decision-  
391 making abilities due to their critical illness. Hence, most patients will not be able to provide informed  
392 consent. Accordingly, informed consent will be sought from the potential subject's legally authorized  
393 representative.  
394

395 Regarding proxy consent, the existing federal research regulations ('the Common Rule') state at  
396 45 CFR 46.116 that: ***"no investigator may involve a human being as a subject in research...unless the***  
397 ***investigator has obtained the legally effective informed consent of the subject or the subject's legally***  
398 ***authorized representative"***; and defines at 45 CFR 46 102 (c) a legally authorized representative (LAR) as:  
399 ***"an individual or judicial or other body authorized under applicable law to consent on behalf of a***  
400 ***prospective subject to the subject's participation in the procedures(s) involved in the research."***  
401 OHRP defined examples of "applicable law" as being state statutes, regulations, case law, or formal opinion of  
402 a State Attorney General that addresses the issue of surrogate consent to medical procedures. Such  
403 "applicable law" could then be considered as empowering the surrogate to provide consent for subject  
404 participation in the research. Interpretation of "applicable law" is therefore state specific and hence, will be left  
405 to the discretion of the individual IRBs of the respective clinical centers involved in the CITRIS-ALI trial.  
406

407 According to a previous President's Bioethics Committee (National Bioethics Advisory Committee), an  
408 investigator should accept as an LAR...***a relative or friend of the potential subject who is recognized***  
409 ***as an LAR for purposes of clinical decision making under the law of the state where the research***  
410 ***takes place.***<sup>62</sup> Finally, OHRP has opined in their determination letters that a surrogate could serve as a  
411 LAR for research decision making if such an individual is authorized under applicable state law to provide  
412 consent for the "procedures" involved in the research study.<sup>63</sup>  
413

### 414 10.4. Justification of Surrogate Consent 415

416 According to the Belmont Report, respect for persons incorporates at least two ethical convictions; first, that  
417 individuals should be treated as autonomous agents, and second, that persons with diminished autonomy  
418 are entitled to protection. One method that serves to protect subjects is restrictions on the participation of  
419 subjects in research that presents more than minimal risks. Commentators and Research Ethics  
420 Commission have held the view that it is permissible to include incapable subjects in research that involves  
421 more than minimal risk as long as there is the potential for beneficial effects and if the research presents a  
422 balance of risks and expected direct benefits ***similar*** to that available in the clinical setting.<sup>64</sup> Several U.S.  
423 task forces have deemed it is permissible to include incapable subjects in research. For example, the  
424 American College of Physicians' document allows surrogates to consent to research involving incapable  
425 subjects only ***"if the net additional risks of participation are not substantially greater than the risks of***



426 *standard treatment.*<sup>65</sup> Finally, the National Bioethics Advisory Committee (NBAC) stated “*that an IRB may*  
427 *approve a protocol that presents greater than minimal risk but offers the prospect of direct medical benefits*  
428 *to the subject, provided that...the potential subject’s LAR gives permission...*”

429  
430 Consistent with the above ethical sensibilities regarding the participation of decisionally incapable subjects  
431 in research and the previous assessment of risks and benefits in the previous section, the present trial  
432 presents a balance of risks and potential direct benefits that is **similar** to that available in the clinical setting,  
433 with the exception of the additional blood draws.  
434

#### 435 **10.5. Additional Safeguards for Vulnerable Subjects**

436  
437 The present research will not involve subjects who might be vulnerable to coercion or undue influence.  
438

#### 439 **10.6. Confidentiality**

440  
441 Federal regulations at 45 CFR 46 111 (a) (7) requires that when appropriate, there are adequate  
442 provisions to protect the privacy of subjects and to maintain the confidentiality of data. To maintain  
443 confidentiality, all laboratory specimens, evaluation forms, and reports will be identified only by a coded  
444 number. The coded number will be generated at random by a computer, and only the study investigators  
445 will have access to the codes. All records will be kept in a locked, password protected computer. All  
446 computer entry and networking programs will be done with coded numbers only. All paper case report  
447 forms will be maintained in a locked cabinet inside a locked office. Clinical information will not be released  
448 without the written permission of the patient, except as necessary for monitoring by the National Heart,  
449 Lung, and Blood Institute, the Federal Drug Administration or other authorized Federal Agencies.  
450

### 451 **11. Adverse Event Reporting/Safety Reporting**

452 Investigators will determine daily if any clinical adverse experiences occur during the period from informed  
453 consent through study hour 168 and will be followed up through resolution, resolved with sequelae,  
454 unresolvable or death.

455  
456 It is expected that Diseases/Illnesses/Symptoms associated with the SEPSIS ALI study population will occur  
457 in the study population, independent of investigation product exposure. These associated  
458 diseases/illnesses/symptoms will be considered as part of the study inclusion processes and/or study  
459 assessments and as such will not be considered ‘reportable’ Adverse Events (AE)/Serious Adverse Events  
460 (SAE) unless the Investigator has a reasonable doubt regarding the relatedness of the event to the  
461 investigational product.

462  
463 The investigator will evaluate any changes in laboratory values and physical signs and will determine if the  
464 change is clinically important and different from what is expected in the course of treatment of patients with  
465 ALI. If clinically important and unexpected adverse experiences occur, they will be recorded on the adverse  
466 event case report form.

467  
468 The following will be considered reportable adverse events:

469  
470 **For this trial, a reportable adverse event is defined as:**

- 471 1. Any clinically important untoward medical occurrence in a patient receiving study drug or

- 473 undergoing study procedures which is different from what is expected in the clinical course of a  
474 patient with severe sepsis associated ALI, or,  
475 2. Any clinically important, untoward medical occurrence that is thought to be associated with the  
476 study drug or procedures, regardless of the “expectedness” of the event for the course of a  
477 patient with severe sepsis associated ALI.  
478 3. Investigators will report all *serious, unexpected, AND study-related* adverse events from the time  
479 of informed consent through study hour 168 that are considered to be harmful and unintended  
480 responses to the investigational product and/or study related procedures in the participants’ case  
481 report forms. ‘Responses to investigational product’ means that the causal relationship between  
482 an investigational product and an adverse event cannot be ruled out.  
483

484 **Expected Events For ALI considered unreportable:** refer to Appendix F Table

- 485 1. Defined as: Untoward clinical occurrences perceived by the investigator to occur with  
486 reasonable frequency in the day to day care of patients with ALI treated in an intensive care  
487 unit with mechanical ventilation.  
488 2. Examples of untoward clinical occurrences that are expected in the course of ALI include: 1)  
489 transient hypoxemia, 2) agitation, 3) delirium, 4) nosocomial infections, 5) skin breakdown,  
490 and 6) gastrointestinal bleeding. Such events, which are often the focus of prevention efforts  
491 as part of usual ICU care, will not be considered reportable adverse events unless the event  
492 is considered by the investigator to be associated with the study drug or procedures, or  
493 unexpectedly severe or frequent for an individual patient with ALI. Examples of  
494 unexpectedly frequent untoward clinical occurrences would be *repeated* episodes of  
495 unexplained hypoxemia. This would be in contrast to an isolated episode of transient  
496 hypoxemia (e.g., SpO<sub>2</sub> ~85%), related to positioning or suctioning. This latter event would  
497 not be considered unexpected by nature, severity or frequency.  
498 3. Adverse events occurring from the time of informed consent through study hour 168 or until  
499 discharged from the hospital, withdrawal from the study or death, will not be considered ‘reportable’  
500 Adverse Events (AE)/Serious Adverse Events (SAE) unless the Investigator has a reasonable  
501 doubt regarding the relatedness of the event to the investigational product.  
502

503 The following will be reported as adverse events:

504  
505 Investigators will report all unanticipated problems that **involve risk or harm to a research participant**  
506 **AND was not anticipated or foreseen (e.g., not described in the consent form) AND is probably or**  
507 **definitely related to or caused by the research**, as defined in Appendix F, to the Data Coordinating  
508 Center by phone and email within 24 hours of becoming aware of event. The Institutional Review Board for  
509 the lead site will be notified within 5 business days of receiving notice of the unanticipated problem.  
510 Participating sites shall report to their Institutional Review Board in accordance with their institution’s rules  
511 and regulations.  
512

513 The Data Coordinating Center (VCU) will report all, unanticipated problems, defined as problems that  
514 **involve risk or harm to a research participant AND was not anticipated or foreseen (e.g., not**  
515 **described in the consent form) AND is probably or definitely related to or caused by the research**, to  
516 the DSMB within 7 calendar days of the CCC being notified of the event. The Data Coordinating Center will  
517 distribute the written summaries of the DSMB’s periodic reviews to participating centers.  
518

519 The Data Coordinating Center will also determine if the serious adverse event is unexpected for Vitamin C.  
520 Unexpected for Vitamin C is defined as any event not listed in the Vitamin C package insert. If the Data  
521 Coordinating Center determines that any serious and study-related adverse event is unexpected for Vitamin  
522 C, the FDA will be notified within 7 calendar days. Such events may also meet the definition of *Unanticipated*  
523 *Problems* as described below.

524  
525  
526  
527  
528  
529  
530  
531  
532  
533  
534  
535  
536  
537  
538  
539  
540  
541  
542  
543  
544  
545  
546

Investigators must report *Unanticipated Problems*, regardless of severity, associated with the study drug or study procedures within 24 hours. An unanticipated problem is defined as follows:

**Unanticipated Problem (UP)**: any incident, experience, or outcome that meets all of the following criteria will be reported from the time of consent through study hour 168 until resolved, withdrawn from the study, death occurs or lost to follow up:

- Unexpected, in terms of nature, severity, or frequency, given the research procedures that are described in the protocol-related documents, such as the IRB-approved research protocol and informed consent document; and the characteristics of the subject population being studied;
- Related or possibly related to participation in the research, in this guidance document, possibly related means there is a reasonable possibility that the incident, experience, or outcome may have been caused by the procedures involved in the research;
- Suggests that the research places subjects or others at a greater risk of harm (including physical, psychological, economic, or social harm) than was previously known or recognized.

**1. Safety Reporting:**

Investigator safety reports are prepared for suspected unanticipated serious adverse reactions according to local regulatory requirements and are forwarded to investigators as necessary. An investigator who receives an investigator safety report describing an SAE(s) or other specific safety information (e.g., summary or listing of SAEs) from the Clinical Coordinating Center will file it and will notify the IRB/IEC, if appropriate, according to local requirements.

547 **12. APPENDICES**  
548  
549

550 **APPENDIX A: Guidelines for evidence of infection**

551 **1. Infections of the thorax:**

- 552 a) Chest x-ray or CT scan showing a new or progressive infiltrate, consolidation,  
553 cavitation, collection, or pleural effusion, and a clinical presentation consistent with  
554 pneumonia or empyema  
555 b) Pneumonia can be defined as the presence of new infiltrate (s), absence of a  
556 noninfectious explanation and either signs of SIRS as per protocol or purulent sputum  
557 production with an identifiable pathogen.  
558 c) Aspiration Pneumonitis in the acute phase is not considered an infection.  
559 d) However, if SIRS persists > 24 hours after aspiration, then an infectious etiology can  
560 be presumed.  
561

562 **2. Abdominal infection:**

- 563 a) Perforated viscus or ischemic bowel with either localized peritonitis  
564 b) Peritoneal fluid with > 250 PMNs  
565 c) Clinical signs of cholangitis or appendicitis  
566 d) Clostridium difficile toxin positive with evidence of colon dilation  
567 e) Suspicion of peritonitis by clinical examination only

568 **3. Skin or soft tissue infection:** Acute onset infection of the skin, such as erysipelas,  
569 or infection involving deeper soft tissue

570 **4. Bacterial meningitis:** cerebrospinal fluid analyses if available and a clinical presentation  
571 consistent with bacterial meningitis

572 **5. Urinary Tract:**

- 573 a) Positive test for granulocyte esterase or nitrate in urine, or a positive culture (defined as >10<sup>5</sup>  
574 CFU/mL)  
575 b) Urinalysis with increased WBC count or positive Gram stain

576 **6. Central Line infections:**

- 577 a) Catheter-related bloodstream infections (CR-BSIs) are defined as bacteremia/fungemia in a  
578 patient with an intravascular catheter with at least one positive blood culture obtained from a  
579 peripheral vein, clinical manifestations of infection (i.e., fever, chills, and/or hypotension), and no  
580 apparent source for the bloodstream infection except the catheter. The catheter must be in  
581 place for at least 48 hours prior to development of the bloodstream infection.  
582

583 **7. Sinusitis**

- 584 a) Air fluid levels in sinus seen on CT scan

585 \*\* Use of antibiotics at time of consent (provided the antibiotics are not for prophylaxis) is considered  
586 evidence of suspected infection. Examples of prophylactic antibiotics include: pre-surgical incision,  
587 antibiotic for the prevention of pneumocystis jiroveci (aka carinii), herpes simplex, cytomegalovirus,  
588 and latent mycobacterial disease.  
589

590 **The following are not considered evidence of infection:**

- 591 a) Fever of unknown origin  
592 b) Blood cultures that are considered positive only because of the isolation of a likely  
593 contaminant organism  
594 c) Postoperative hypotension within 24 hours of incision and/or fever without a verified  
595 infectious focus.  
596 d) Leukocytosis alone in the presence of steroid usage is insufficient evidence of infection.

597  
598  
599

e) Leukocytosis alone in the presence of connective tissue disorder is insufficient evidence of infection.

---

FINAL

## APPENDIX B: Pleiotropic Effects of Vitamin C

### **1. Cell culture/in vitro studies**

- Reduced human neutrophil adhesion to endothelial cells<sup>66</sup>
- Protects neutrophils against intracellular effects of superoxide generation.<sup>67</sup>
- Protects monocytes against oxidative damage<sup>68</sup>
- Reduced PMA induction of NF-κB
- Protects against oxidized-LDL-induced expression of MCP-1 in cultured human umbilical vein endothelial cells<sup>69</sup>
- Modulates the inhibition of platelet aggregation by neutrophils<sup>70</sup>
- Inhibits expression of platelet expression of CD40 ligand which promotes thrombosis<sup>71</sup>
- Inhibits NADPH oxidase subunit p47phox expression in microvascular endothelium<sup>72</sup>
- Influences dendritic cell function.<sup>73</sup>
- Effects of vitamin C on intra cytoplasmic cytokine production in human whole blood monocytes and lymphocytes. exposed to LPS or immune complexes<sup>74</sup>
- Inhibition of the induction of inducible nitric oxide synthetase (iNOS) and TNF-α, IL-1β and IL-6 in astrocytes, microglia and macrophages stimulated with LPS or cytokines
- Vitamin C inhibits NO-induced stabilization of HIF-1alpha in HUVECs<sup>75</sup>
- Cobalt-induced oxidant stress in cultured endothelial cells: prevention by ascorbate in relation to HIF-1alpha.<sup>76</sup>

### **2. Intact animal studies**

- Attenuates LPS induced acute lung injury.<sup>77</sup>
- Attenuates lung injury in a cecal ligation and puncture model of peritonitis.<sup>78</sup>
- Corrects capillary blood flow in septic skeletal musculature.<sup>79</sup>
- Inhibits iNOS expression in septic vasculature.<sup>80</sup>
- Attenuates iNOS expression in IFN gamma-stimulated rat skeletal muscle endothelial cells<sup>81</sup>
- Attenuates hepatic fibrosis by upregulating peroxisome proliferators-activated receptor-gamma<sup>82</sup>
- Inhibits both flow- and agonist-induced EDHF in the rat mesentery<sup>83,84</sup>
- Multiple molecular transporters responsible for movement of ascorbate intracellular<sup>85</sup>
- Attenuates peroxidative damage and tissue edema in ischemia/reperfused gut.<sup>86</sup>
- Ascorbate supplementation significantly decreases plasma IL-6 levels in an animal model of hemorrhagic shock.<sup>87</sup>
- Vitamin C deficiency causes the collagen-disassembly disease scurvy
- Ascorbic acid prevents testosterone-induced hyperplasia of rat prostate by down-regulating HIF-1alpha<sup>88</sup>
- Plasma AA maintains the stability of “acellular Hb” susceptible to oxidation<sup>89</sup>
- Endogenous ascorbate on oxidation, oxygenation, and toxicokinetics of cell-free modified hemoglobin after exchange transfusion in rat and guinea<sup>90</sup>

### **Human studies**

- Normalizes monocyte adhesion to endothelium in vitamin C deficient subjects.<sup>91</sup>
- Supplementation in chronic hemodialysis patients reduce lymphocyte 8-OHdG levels and intracellular ROS production<sup>92</sup>
- Increase in muscle blood flow during dynamic exercise with acute AA administration in older adult humans<sup>93</sup>
- Intravenous ascorbate improves outcomes during percutaneous myocardial intervention<sup>94</sup>
- Plasma vitamin C level positively associated with serum pre-albumin levels and negatively associated with high sensitivity C-Reactive Protein levels in patients with chronic renal failure.<sup>95,96</sup>

650  
651  
652  
653  
654  
655  
656  
657

- Low plasma ascorbate levels are associated with enhanced proinflammatory responses and impaired vascular function in lean and obese men.<sup>97</sup>
  - Reduced inflammatory tissue damage in patients subjected to cardiac surgery with extracorporeal circulation<sup>98</sup>
  - Ascorbate promotes iron utilization for erythropoiesis in patients with chronic renal failure<sup>99</sup>
  - High dose vitamin C infusion into surgically critically ill daily for 28 days attenuated the incidence of acute lung injury/ARDS.<sup>100</sup>
- 

FINAL

## APPENDIX C: Ventilator Procedures

### C.1. Ventilator Management

A modified, simplified version of the ARDS Network lung protective lower tidal volume strategy will be used in this trial. This strategy, which was associated with low mortality rates in three previous ARDS Network trials (ARMA, ALVEOLI, and FACTT), will ensure that study subjects receive the beneficial effects of lung protection while participating in this trial.<sup>101 102</sup> The PI/PDs (Drs. Fowler, Truitt, Hite, Martin) and professionals at the CITRIS-ALI consortium medical centers have significant experience with the application of ARDS Network ventilation protocols.

1. Any mode of ventilation capable of delivering the prescribed tidal volume ( $V_T$ , 6ml/kg predicted body weight, +/- 2ml/kg) may be used, provided the  $V_T$  target is monitored and adjusted appropriately. If airway pressure release ventilation (APRV) is used, tidal volume is defined as the sum of the volume that results from the ventilator pressure- release and an estimation of the average spontaneous  $V_T$ .
2.  $V_T$  Goal: 6 ml / kg predicted body weight.
3. Predicted body weight (PBW) is calculated from age, gender, and height (heel to crown)
  - a. according to the following equations:
  - b. Males:  $PBW \text{ (kg)} = 50 + 2.3 [\text{height (inches)} - 60]$
  - c. Females:  $PBW \text{ (kg)} = 45.5 + 2.3 [\text{height (inches)} - 60]$
4. Measure and record inspiratory plateau pressure (Pplat) according to ICU routine (at least every four hours and after changes in  $V_T$  and PEEP recommended)
5. If Pplat > 30 cm H<sub>2</sub>O, reduce  $V_T$  to 5 ml/kg and then to 4 ml/kg PBW if necessary to decrease Pplat to ≤ 30 cm H<sub>2</sub>O.
6. If  $V_T$  < 6 ml/kg PBW and Pplat < 25 cm H<sub>2</sub>O, raise  $V_T$  by 1 ml/kg PBW to a maximum of 6 ml/kg.
7. If "severe dyspnea" (more than 3 double breaths per minute or airway pressure remains at or below PEEP level during inspiration), then raise  $V_T$  to 7 or 8 ml/kg PBW if Pplat remains below 30 cm H<sub>2</sub>O. If Pplat exceeds 30 cm H<sub>2</sub>O with  $V_T$  of 7 or 8 ml/kg PBW, then revert to lower  $V_T$  and consider more sedation.
8. If pH < 7.15,  $V_T$  may be raised and Pplat limit suspended (not required).
9. Oxygenation target: **[55 mm Hg < PaO<sub>2</sub> < 80 mm Hg]** or **[88% < SpO<sub>2</sub> < 95%]**. When both PaO<sub>2</sub> and SpO<sub>2</sub> are available simultaneously, the PaO<sub>2</sub> criterion will take precedence.
10. Minimum PEEP = 5 cm H<sub>2</sub>O
11. Adjust F<sub>i</sub>O<sub>2</sub> or PEEP upward within 5 minutes if there are consistent measurements below the oxygenation target range
12. Adjust F<sub>i</sub>O<sub>2</sub> or PEEP downward within 30 minutes if there are consistent measurements above the oxygenation target range.
13. There are no requirements for maintaining a specific PEEP to F<sub>i</sub>O<sub>2</sub> ratio. The lower PEEP/higher F<sub>i</sub>O<sub>2</sub> table represents a consensus approach developed by ARDS Network investigators in 1995. The higher PEEP/lower F<sub>i</sub>O<sub>2</sub> table (ALVEOLI) yielded equivalent results in a randomized trial and would be acceptable and perhaps preferable in patients who appear to respond with a substantial increase in arterial oxygenation in the transition from lower to higher PEEP.

#### Lower PEEP/Higher F<sub>i</sub>O<sub>2</sub> Treatment Group



|                               |     |     |     |     |     |     |     |     |     |     |     |     |     |       |
|-------------------------------|-----|-----|-----|-----|-----|-----|-----|-----|-----|-----|-----|-----|-----|-------|
| F <sub>i</sub> O <sub>2</sub> | .30 | .40 | .40 | .50 | .50 | .60 | .70 | .70 | .70 | .80 | .90 | .90 | .90 | 1.0   |
| PEEP                          | 5   | 5   | 8   | 8   | 10  | 10  | 10  | 12  | 14  | 14  | 14  | 16  | 18  | 18-24 |

### Higher PEEP/Lower F<sub>i</sub>O<sub>2</sub> Study Group

|                               |     |     |     |     |     |     |     |     |     |           |     |     |     |     |
|-------------------------------|-----|-----|-----|-----|-----|-----|-----|-----|-----|-----------|-----|-----|-----|-----|
| F <sub>i</sub> O <sub>2</sub> | .30 | .30 | .30 | .30 | .30 | .40 | .40 | .50 | .50 | .50 – .80 | .80 | .90 | 1.0 | 1.0 |
| PEEP                          | 5   | 8   | 10  | 12  | 14  | 14  | 16  | 16  | 18  | 20        | 22  | 22  | 22  | 24  |

Note: Levels of PEEP in these F<sub>i</sub>O<sub>2</sub>/ PEEP tables represent levels set on the ventilator, not levels of total-PEEP, auto-PEEP, or intrinsic-PEEP.

14. No specific rules for respiratory rate. It is recommended that the respiratory rate be increased in increments to a maximum set rate of 35 if pH < 7.30.
15. No specific rules about I:E ratio. It is recommended that duration of Inspiration be ≤ duration of Expiration.
16. Bicarbonate is allowed (neither encouraged nor discouraged) if pH < 7.30.
17. Changes in more than one ventilator setting driven by measurements of PaO<sub>2</sub>, pH, and Pplat may be performed simultaneously, if necessary.

## C.2. Weaning

### Commencement of Weaning (applicable to patients ventilated invasively or non-invasively)

Patients will be assessed for the following weaning readiness criteria each day between 0600 and 1000. If a patient procedure, test, or other extenuating circumstance prevents assessment for these criteria between 06:00 and 10:00, then the assessment and initiation of subsequent weaning procedures may be delayed for up to six hours.

1. At least 12 hours since enrollment in the trial
2. F<sub>i</sub>O<sub>2</sub> ≤ 0.40 and PEEP ≤ 8 cm H<sub>2</sub>O or F<sub>i</sub>O<sub>2</sub> ≤ 0.50 and PEEP = 5 cm H<sub>2</sub>O
3. Values of both PEEP and F<sub>i</sub>O<sub>2</sub> ≤ values from previous day
4. Not receiving neuromuscular blocking agents and without neuromuscular blockade
5. Patient exhibiting inspiratory efforts. If no efforts are evident at baseline, ventilator set rate will be decreased to 50% of baseline level for up to 5 minutes to detect inspiratory efforts.
6. Systolic arterial pressure ≥ 90 mm Hg without vasopressor support (≤ 5 mcg/kg/min dopamine will not be considered a vasopressor)

### Spontaneous Breathing Trial Procedure and Assessment for Unassisted Breathing

If criteria 1-6 above are met, then initiate a trial of up to 120 minutes of spontaneous breathing with F<sub>i</sub>O<sub>2</sub> < 0.5 using any of the following approaches:

1. Pressure support (PS) < 5 cm H<sub>2</sub>O, PEEP < 5 cm H<sub>2</sub>O
2. CPAP < 5 cm H<sub>2</sub>O
3. T-piece
4. Tracheostomy collar (mask)

**The clinical team may decide to change mode during spontaneous breathing (PS = 5, CPAP, tracheostomy mask, or T-piece) at any time during the spontaneous breathing trial.**

Monitor for tolerance using the following:

- 753 1. SpO<sub>2</sub> ≥ 90% and / or PaO<sub>2</sub> ≥ 60 mm Hg  
754 2. Mean spontaneous tidal volume ≥ 4 ml/kg PBW (if measured)  
755 3. Respiratory Rate ≤ 35 / min  
756 4. pH ≥ 7.30 (if measured)  
757 5. No respiratory distress (defined as 2 or more of the following):  
758 a. Heart rate ≥ 120% of the 0600 rate ( ≤ 5 min at > 120% may be tolerated)  
759 b. Marked use of accessory muscles  
760 c. Abdominal paradox  
761 d. Diaphoresis  
762 e. Marked subjective dyspnea  
763

764 If any of the goals a-e are not met, revert to previous ventilator settings or to PS greater than or equal to  
765 10 cm H<sub>2</sub>O with Positive End-expiratory Pressure and F<sub>i</sub>O<sub>2</sub> = previous settings and reassess for  
766 weaning the next morning. The patient will be reassessed for weaning (Section C2) the following day.  
767

#### 768 **Decision to remove ventilatory support:**

769 If tolerance criteria for spontaneous breathing trial (a-e above) are met for at least 30 minutes, the  
770 clinical team may decide to discontinue mechanical ventilation. However, the spontaneous breathing  
771 trial can continue for up to 120 minutes if tolerance remains in question.  
772

### 773 **C.3. Definition of Unassisted Breathing**

- 774 1. Spontaneously breathing with face mask, nasal prong oxygen, or room air, OR  
775 2. T-tube breathing, OR  
776 3. Tracheostomy collar (mask) breathing, OR  
777 4. CPAP ≤ 5 without PS or IMV assistance  
778 5. Use of CPAP or BIPAP solely for sleep apnea management  
779

### 780 **C.4. Definition of Extubation**

- 781 1. Removal of an oral or nasotracheal tube  
782 2. If a patient receives a tracheostomy, the time of extubation is defined as the time when the patient  
783 achieves unassisted breathing as defined in section C.3  
784

### 785 **C.5. Completion of Ventilator Procedures**

786 Patients will be considered to have completed the study ventilator procedures if any of the following  
787 conditions occur:  
788

- 789 1. Death  
790 2. Hospital discharge  
791 3. Alive 28 days after enrollment  
792

793  
794 If a patient requires positive pressure ventilation after a period of unassisted breathing, the study  
795 ventilator procedures will resume unless the patient was discharged from the hospital or > 28 days  
796 elapsed since enrollment.  
797

### 798 **C.6. Removal from the Ventilator Management Protocol**

799 Patients may be removed from the 6 ml/kg PBW tidal volume ventilation requirement if they develop  
800

801  
802  
803  
804

neurologic conditions where hypercapnia would be contraindicated (e.g., intracranial bleeding, GCS < 8, cerebral edema, mass effect [midline shift on CT scan], papilledema, intracranial pressure monitoring, fixed pupils).

---

FINAL

**APPENDIX D: FACTT LITE Conservative Fluid Management Approach**

**If patient does not have a MAP > 60mmHg and has not been off vasopressors for > 12 hours, then patient does not meet criteria for any actions prescribed in the Fluid Management Approach. Document as “Not Clinically Indicated”.**

This fluid protocol captures the primary positive outcome of the FACTT trial on increasing ventilator free days. If clinically possible, for patients with a CVC, this protocol should be initiated within four hours of randomization in enrolled patients, and continued until UAB or study day 7, whichever occurs first.

- Discontinue maintenance fluids.
- Continue medications and nutrition.
- Manage electrolytes and blood products per usual practice.
- For shock, use any combination of fluid boluses<sup>#</sup> and vasopressor(s) to achieve MAP ≥ 60 mmHg as fast as possible. Wean vasopressors as quickly as tolerated beginning four hours after blood pressure has stabilized.
- Withhold diuretic therapy in renal failure<sup>§</sup> and until 12 hours after last fluid bolus or vasopressor given.

| CVP<br>(recommend ) | PAOP<br>(optional) | MAP ≥ 60 mm Hg AND off vasopressors for ≥ 12 hours |                                                                            |
|---------------------|--------------------|----------------------------------------------------|----------------------------------------------------------------------------|
|                     |                    | Average urine output < 0.5 ml/kg/hr                | Average urine output ≥ 0.5 ml/kg/hr                                        |
| >8                  | > 12               | Furosemide*<br>Reassess in 1 hour                  | 1835<br>1836<br>Furosemide*<br>1837<br>Reassess in 4 hours<br>1838<br>1839 |
| 4-8                 | 8-12               | Give fluid bolus as fast as possible <sup>#</sup>  | 1840<br>1841                                                               |
| < 4                 | < 8                | Reassess in 1 hour                                 | No intervention<br>1842<br>Reassess in 4 hours<br>1843<br>1844             |

§ Renal failure is defined as dialysis dependence, oliguria with serum creatinine > 3mg/dl, or oliguria with serum creatinine 0-3 with urinary indices indicative of acute renal failure.

# Recommended fluid bolus= 15 mL / kg crystalloid (round to nearest 250 mL) or 1 Unit packed red cells or 25 grams albumin

\*Recommended Furosemide dosing = begin with 20 mg bolus or 3 mg / hr infusion or last known effective dose. Double each subsequent dose until goal achieved (oliguria reversal or intravascular pressure target) or maximum infusion rate of 24 mg / hr or 160 mg bolus reached. Do not exceed 620 mg / day. Also, if patient has heart failure, consider treatment with dobutamine.

857  
858  
859

**APPENDIX E: Time Events Schedule**

| <b><u>Assessments</u></b>                                                                                           | <b><u>Hour 0</u></b> | <b><u>Q 24 hrs 1<sup>st</sup> 7 days or in ICU</u></b> | <b><u>Hour 48</u></b> | <b><u>Hour 96</u></b> | <b><u>Hour 168</u></b> | <b><u>Day 28</u></b> | <b><u>Day 60</u></b> |
|---------------------------------------------------------------------------------------------------------------------|----------------------|--------------------------------------------------------|-----------------------|-----------------------|------------------------|----------------------|----------------------|
| <b><u>VS: BP, HR, MAP, RR, Temp., O2 sats, CVP, Glasgow Coma Scale</u></b>                                          | X                    |                                                        | X                     | X                     | X                      |                      |                      |
| <b><u>Body Weight</u></b>                                                                                           | A                    |                                                        | A                     | A                     |                        |                      |                      |
| <b><u>Suspected or known site of sepsis</u></b>                                                                     | A                    |                                                        | A                     | A                     | A                      | A                    | A                    |
| <b><u>I/Os Total and Urine only</u></b>                                                                             |                      | X                                                      |                       |                       |                        |                      |                      |
| <b><u>Assessment of Acute/Chronic Renal Failure and Use of Dialysis</u></b>                                         | X                    |                                                        | X                     | X                     | X                      | X                    |                      |
| <b><u>Calculate SOFA Score (post study by biostatistician)</u></b>                                                  | X                    |                                                        | X                     | X                     | X                      |                      |                      |
| <b><u>Calculate VE40 Score (post study by biostatistician)</u></b>                                                  | A                    |                                                        | A                     | A                     | A                      |                      |                      |
| <b><u>Calculate Oxygenation Index (post study by biostatistician)</u></b>                                           | A                    |                                                        | A                     | A                     | A                      |                      |                      |
| <b><u>Ventilator Data:</u></b>                                                                                      |                      |                                                        |                       |                       |                        |                      |                      |
| <b><u>Tv, FiO2, PEEP, Plateau Pressure, Peak Inspiratory Pressure, Mean Airway Pressure, Minute Ventilation</u></b> | A                    |                                                        | A                     | A                     | A                      |                      |                      |
| <b><u>Labs:</u></b>                                                                                                 |                      |                                                        |                       |                       |                        |                      |                      |
| <b><u>Arterial Blood Gasses, Na+, K+, BUN, Cr, WBC, Hgb, Hct, Platelets, PT/INR</u></b>                             | X                    |                                                        | X                     | X                     | X                      |                      |                      |
| <b><u>Bilirubin Total</u></b>                                                                                       | X                    |                                                        | X                     | X                     | X                      |                      |                      |
| <b><u>Vasopressors or Inotropes:</u></b>                                                                            |                      |                                                        |                       |                       |                        |                      |                      |
| <b><u>Epi, Nor-epi, Phenylephrine, Vasopressin, Dopamine</u></b>                                                    | A                    |                                                        | A                     | A                     | A                      |                      |                      |
| <b><u>Concomitant Medications:</u></b>                                                                              |                      |                                                        |                       |                       |                        |                      |                      |
| <b><u>Methylprednisone, Hydrocortisone</u></b>                                                                      | X                    |                                                        | X                     | X                     | X                      |                      |                      |
| <b><u>AE/SAE Assessments</u></b>                                                                                    | X                    |                                                        | X                     | X                     | X                      |                      |                      |
| <b><u>Blood for Biomarkers</u></b>                                                                                  | X                    |                                                        | X                     | X                     | X                      |                      |                      |
| <b><u>Ventilator Free Days</u></b>                                                                                  |                      |                                                        |                       |                       |                        | X                    |                      |
| <b><u>All Cause Mortality</u></b>                                                                                   |                      |                                                        |                       |                       |                        | X                    |                      |
| <b><u>ICU Free Days</u></b>                                                                                         |                      |                                                        |                       |                       |                        | X                    |                      |
| <b><u>Hospital Free Days</u></b>                                                                                    |                      |                                                        |                       |                       |                        |                      | X                    |
| <b><u>Glucose Monitoring</u></b>                                                                                    | I                    | I                                                      | I                     | I                     | I                      |                      |                      |

860  
861  
862 X = Required  
863 I= As Needed (See Section 3.3.2)  
864 A=When available  
865

## APPENDIX F: Adverse Events

### Procedures for Reporting Adverse Events

Assuring patient safety is an essential component of this protocol. Each participating investigator has primary responsibility for the safety of the individual participants under his or her care. The Principal Investigator will evaluate all adverse events. The Study Coordinator must view patient records for possible adverse events throughout the study period.

AE/SAEs that meet the definition of reportable events (refer to Appendix F Table 1: Anticipated AEs) or as determined by the investigator, will be followed from the time of consent through study hour 168 until resolved, resolved with sequelae, unresolvable, or death.

SAEs will be collected over the same time period as stated above for AEs. However, any AEs/SAEs assessed as related to study participation (e.g. Disease under study) will be recorded from the time of consenting up to and including study hour 168, discharge from the hospital, withdrawal, lost to follow up, or death.

Events that **do not** meet the definition of an AE include:

- Any clinically significant abnormal laboratory findings or other abnormal safety assessments that are associated with the underlying disease, unless judged by the investigator to be more severe than expected for the subject's condition.
- The disease/disorder being studied, or expected progression, signs, or symptoms of the disease/disorder being studied, unless more severe than expected for the subject's condition.
- Medical or surgical procedure (e.g., endoscopy, appendectomy); the condition that leads to the procedure is an AE.
- Situations where an untoward medical occurrence did not occur (social and/or convenience admission to a hospital).
- Anticipated day-to-day fluctuations of pre-existing disease(s) or condition(s) present or detected at the start of the study that do not worsen;
- "Lack of efficacy" or "failure of expected pharmacological action" would not be reported as an AE or SAE. However, the signs and symptoms and/or clinical sequelae resulting from lack of efficacy will be reported if they meet the definition of an AE or SAE.

If an event does not meet the definition of an AE per Section 11, then it cannot be an SAE even if serious conditions are met (e.g., hospitalization for signs/symptoms of the disease under study, death due to progression of disease, etc).

### SAE Follow-up language:

All AEs and SAEs will be followed until resolution, until the condition stabilizes, until the event is otherwise explained, or until the subject is lost to follow-up.

The investigator is obligated to perform or arrange for the conduct of supplemental measurements and/or evaluations as may be indicated or as requested by the Lead Site to explain as fully as possible the nature and/or causality of the AE or SAE. The investigator is obligated to assist. This may include additional

laboratory tests or procedures, or consultation with other health care professionals. If a subject dies during participation in the study or during a recognized follow-up period, the investigator will provide the Lead Site with a copy of any autopsy reports.

New or updated information will be recorded on the SAE report form. The investigator will submit any updated SAE form to the Lead Site within the designated reporting time frames.

Once the investigator determines that an event meets the protocol definition of an SAE, the SAE will be reported to the Lead Site **within 24 hours**. Any follow-up information on a previously reported SAE will also be reported to the Lead Site within 24 hours.

The investigator will always provide an assessment of causality at the time of the initial report as described in Section 11.

The primary mechanism for reporting SAEs to the Lead Site will be through REDCap and facsimile with an accompanying email. If the electronic system is unavailable for greater than 24 hours, the site will fax and email. Then the site will enter the serious adverse event data into REDCap as soon as it becomes available.

After the study is completed at a given site, REDCap will be taken off-line to prevent the entry of new data or changes to existing data. If a site receives a report of a new SAE from a study participant or receives updated data on a previously reported SAE after REDCap has been taken off-line, the site can report this information on a paper SAE form via email.

Facsimile transmission of the SAE form is the preferred method to transmit this information to the Lead Site for SAE receipt. In rare circumstances and in the absence of facsimile equipment, notification by telephone is acceptable, with a copy of the SAE data collection tool sent by overnight mail. Initial notification via the telephone does not replace the need for the investigator to complete and sign the SAE data collection tool within the designated reporting time frames.

1. *Serious, Expected, AND Study-Related Adverse Events*: adverse events occurring from the time of informed consent through study hour 168 or until discharged from the hospital, withdrawal from the study, or death will not be considered 'reportable' Adverse Events (AE)/Serious Adverse Events (SAE) unless the Investigator has a reasonable doubt regarding the relatedness of the event to the investigational product (refer to Table: Anticipated AE/SAEs for the SEPSIS ALI Study Population).
2. *Serious, Unexpected, AND Study-Related Adverse Events*: Investigators will report all *serious, unexpected, AND study-related* adverse events from the time of informed consent through study hour 168, to the Clinical Coordinating Center within 24 hours by email. The local Institutional Review Board must also be notified in a timely manner. The investigator will then submit a detailed written report to the Clinical Coordinating Center and the local Institutional Review Board no later than 5 calendar days after the investigator discovers the event.
3. Definitions of Adverse Events
  - a. A *serious* adverse event is any event that is fatal or immediately life threatening, is permanently disabling, or severely incapacitating, or requires or prolongs inpatient hospitalization. Important medical events that may not result in death, be life threatening, or require hospitalization may be considered serious adverse events when, based upon appropriate medical judgment, they may jeopardize the patient or subject and may require medical or surgical intervention to prevent one of the outcomes listed above. Life-threatening means that the patient was, in the view of the investigator, at immediate risk of death from the

952 reaction as it occurred. This definition does not include a reaction that, had it occurred in a  
953 more serious form, might have caused death. Assessment of the cause of the event has no  
954 bearing on the assessment of the event's severity.

- 955 b. An *unexpected* event is any experience not identified by the type, severity, or frequency in  
956 the current study protocol or an event that is unexpected in the course of treatment for ALI  
957 or ARDS.
- 958 c. Adverse events will be considered to be study-related if the event follows a reasonable  
959 temporal sequence from a study procedure and could readily have been produced by the  
960 study procedure.
- 961 d. Organ failures or death related to ALI or ARDS or the patient's underlying condition that are  
962 systematically captured by the protocol should not be reported as adverse events *unless they*  
963 *are considered to be study related*.

#### 964 4. Assigning Causality

- 965 a. The investigator is obligated to assess the relationship between investigational product and  
966 the occurrence of each AE/SAE. A "reasonable possibility" is meant to convey that there are  
967 facts/evidence or arguments to suggest a causal relationship, rather than a relationship  
968 cannot be ruled out. The investigator will use clinical judgment to determine the relationship.  
969 Alternative causes, such as natural history of the underlying diseases, concomitant therapy,  
970 other risk factors, and the sequential relationship of the event to the investigational product  
971 will be considered and investigated. The investigator will also consult the Investigator  
972 Brochure (IB) and/or Product Information, for marketed products, in the determination of  
973 his/her assessment.
- 974 b. There may be situations when an SAE has occurred and the investigator has minimal  
975 information to include in the initial report to VCU. However, **it is very important that the**  
976 **investigator always make an assessment of causality for every event prior to the initial**  
977 **transmission of the SAE data to VCU.** The investigator may change his/her opinion of  
978 causality in light of follow-up information, amending the SAE report form.
  - 979 • **Unrelated:**
    - 980 ○ Event occurred before dosing;
    - 981 ○ Event or concomitant illness due to factors other than drug or study procedure;
  - 982 • **Possibly:**
    - 983 ○ Reasonable sequential relationship with study procedure or drug treatment;
    - 984 ○ Event could be explained by patient's clinical state or other factors
  - 985 • **Probably:**
    - 986 ○ Reasonable sequential relationship with study procedure or drug treatment;
    - 987 ○ Likely to be a known reaction to study agent or chemical group, or predicted by  
988 known pharmacology;
    - 989 ○ Event cannot easily be explained by patient's clinical state or other factors.
  - 990 • **Definitely:**
    - 991 ○ Distinct sequential relationship with study procedure or drug treatment;
    - 992 ○ Known reaction to study agent or chemical group, or predicted by known  
993 pharmacology;
    - 994 ○ Event cannot be explained by patient's clinical state or other factors.

#### 995 **ANTICIPATED AE/SAEs for the SEPSIS ALI Study Population**

996 The following is a list of anticipated Diseases/Illnesses associated with the SEPSIS ALI study population and  
997 are expected to occur in the study population, independent of investigation product exposure; will be captured  
000 as part of the study inclusion processes and/or study assessments and as such will not be considered  
001



'reportable' Adverse Events (AE)/Serious Adverse Events (SAE) unless the Investigator has a reasonable doubt regarding the relatedness of the event to the investigational product, from the time of informed consent through Study hour 168 or until discharged from the hospital, withdrawn from the study or death.

AE/SAEs that meet the definition of reportable events or as determined by the investigator, will be followed from the time of consent through study hour 168 until resolved, resolved with sequelae or considered unresolvable.

NOTE: this list is meant to be as comprehensive as possible for expected events for the Disease under study and may not include all events. The Investigator responsibilities for reporting of AE/SAEs still apply, regardless of the table below and should be reported if the Investigator has a reasonable doubt regarding the relatedness of the event to the investigational product.

Table 1:

| Expected Disease(s) Under Study                                                                                                                                                                                                           | Associated Symptoms and Labs                                                                                                                                                                                                                                                                                                                                                                                                                                                                                                                                                                |
|-------------------------------------------------------------------------------------------------------------------------------------------------------------------------------------------------------------------------------------------|---------------------------------------------------------------------------------------------------------------------------------------------------------------------------------------------------------------------------------------------------------------------------------------------------------------------------------------------------------------------------------------------------------------------------------------------------------------------------------------------------------------------------------------------------------------------------------------------|
| <b>Infection</b>                                                                                                                                                                                                                          | (e.g., thorax, urinary tract, abdomen, skin, sinuses, bacterial meningitis, central venous catheters, and central nervous system, <b>see Appendix A</b> )<br><br>** Use of antibiotics at time of consent (provided the antibiotics are not for prophylaxis) is considered evidence of suspected infection. Examples of prophylactic antibiotics include: pre-surgical incision, antibiotic for the prevention of pneumocystis jiroveci (aka carinii), herpes simplex, cytomegalovirus, and latent mycobacterial disease.                                                                   |
| <b>Acute Lung Injury (ALI)</b>                                                                                                                                                                                                            | <b>Fever:</b> >38°C (any route) or hypothermia: <36°C (core temp only),<br><b>Tachycardia:</b> heart rate > 90 beats/min or receiving medications that slow heart rate or paced rhythm,<br><b>Leukocytosis:</b> >12,000 WBC/μL or <b>leukopenia:</b> <4,000 WBC/μL or >10% band forms.<br><b>Respiratory rate</b> > 20 breaths per minute or<br><b>PaCO<sub>2</sub></b> < 32 or invasive mechanical ventilation.                                                                                                                                                                            |
| <b>Adult Respiratory Distress Syndrome (ARDS)</b>                                                                                                                                                                                         | <b>Lung injury of acute onset</b> , within 1 week of an apparent clinical insult and with progression of respiratory symptoms;<br><b>Bilateral opacities on chest imaging</b> not explained by other pulmonary pathology (e.g. pleural effusions, lung collapse, or nodules);<br><b>Respiratory failure</b> not explained by heart failure or volume overload;<br><b>Decreased arterial PaO<sub>2</sub>/FiO<sub>2</sub> ratio</b> ≤ 300 mm Hg;<br><b>Minimum PEEP</b> of 5 cmH <sub>2</sub> O                                                                                               |
| <b>Systemic Inflammatory Responses (SIRS)</b>                                                                                                                                                                                             | <b>Fever</b> > 38°C (any route) or hypothermia: < 36°C (core temp. only)<br><b>Tachycardia:</b> heart rate > 90 beats/min or receiving medications that slow heart rate or paced rhythm<br><b>Respiratory Rate</b> > 20 breaths per minute or PaCO <sub>2</sub> < 32 or invasive mechanical ventilation<br><b>Leukocytosis:</b> > 12,000 WBC /μL or leukopenia: <4,000 WBC/μL or >10% band forms                                                                                                                                                                                            |
| <b>Sepsis associated System Organ Failure (SOF)</b><br>The current trial will be enrolling patients with sepsis associated acute lung injury. We therefore expect that many of these patients will have some degree of organ dysfunction. | <b>Sepsis associated hypotension</b> (systolic blood pressure (SBP) < 90 mm Hg or an SBP decrease > 40 mm Hg unexplained by other causes or use of vasopressors for blood pressure support (epinephrine, norepinephrine, dopamine => 5mcg, phenylephrine, vasopressin);<br><b>Arterial hypoxemia</b> (PaO <sub>2</sub> /FiO <sub>2</sub> < 300) or supplemental O <sub>2</sub> > 6LPM.<br><b>Lactate</b> > upper limits of normal laboratory results<br><b>Urine output</b> < 0.5 ml/kg/hour for > two hours despite adequate fluid resuscitation<br><b>Platelet count</b> < 100,000 per mL |

|                                                                                                                         |                                                                                                                                                                                                                                                                                                                                                                                                                                                                                                     |
|-------------------------------------------------------------------------------------------------------------------------|-----------------------------------------------------------------------------------------------------------------------------------------------------------------------------------------------------------------------------------------------------------------------------------------------------------------------------------------------------------------------------------------------------------------------------------------------------------------------------------------------------|
|                                                                                                                         | <p><b>Coagulopathy</b> (INR &gt; 1.5)<br/> <b>Bilirubin</b> &gt; 2 mg/dL<br/> <b>Glasgow Coma Scale</b> &lt; 11 or a positive CAM ICU score</p>                                                                                                                                                                                                                                                                                                                                                     |
| <b>Biomarkers of Inflammation, Vascular Injury and Alveolar epithelial injury</b>                                       | Increases in C-reactive protein (CRP), procalcitonin (PCT), thrombomodulin (TM) alveolar epithelial injury (Receptor for Advanced Glycation Products)                                                                                                                                                                                                                                                                                                                                               |
| <b>Lactic Acidosis</b>                                                                                                  | Patients with sepsis are at high risk of metabolic acidosis (including lactic acidosis). To prevent the possibility of metabolic acidosis due to drug administration, the study drug is formulated to a neutral pH of 7.4. Therefore, we do not anticipate the need for additional monitoring of acid/base balance beyond standard-of-care provided at each institution. Any observed abnormalities will be evaluated according to standard-of-care practice and documented in the research record. |
| <b>Use of Dialysis</b>                                                                                                  | In the presence of Acute or Chronic renal failure.                                                                                                                                                                                                                                                                                                                                                                                                                                                  |
| <b>Septic Shock</b>                                                                                                     | Fluid management during shock will not be prescribed per study protocol. In subjects who are not in shock, a conservative fluid management approach will be administered, if possible. (refer to Appendix D, Table 5).                                                                                                                                                                                                                                                                              |
| <b>Use of Ventilator</b>                                                                                                | As per protocol (refer to Section 5.5 and Appendix C)                                                                                                                                                                                                                                                                                                                                                                                                                                               |
| <b>Plasma Ascorbate levels</b>                                                                                          | Septic patients exhibit subnormal plasma ascorbate levels. Phase I studies performed at Virginia Commonwealth University (VCU) show mean ascorbate levels of 17.5 µM (normal human ascorbate levels 60 to 70 µM). The day 2 – 7 plasma ascorbate levels are expected to be between 500 to 1000 µM.                                                                                                                                                                                                  |
| <b>Death</b>                                                                                                            | Organ failures or death related to ALI or ARDS or the patient's underlying condition that are systematically captured by the protocol should not be reported as adverse events <i>unless they are considered to be study related.</i> (refer to Appendix F).                                                                                                                                                                                                                                        |
| <b>NOTE: All AE/SAEs considered "Reportable" will be captured on the adverse event log and reported to the sponsor.</b> |                                                                                                                                                                                                                                                                                                                                                                                                                                                                                                     |

013  
014  
015

016  
017

**APPENDIX G: Modified SOFA Score Calculator**

| Value                                                                  | 0                      | 1          | 2                  | 3                                               | 4                                                 | Score        |
|------------------------------------------------------------------------|------------------------|------------|--------------------|-------------------------------------------------|---------------------------------------------------|--------------|
| <b>Respiratory</b><br>PaO <sub>2</sub> /FiO <sub>2</sub>               | >400                   | ≤400       | ≤300               | ≤200<br>with<br>respiratory<br>support          | ≤100<br>with<br>respiratory<br>support            |              |
| <b>Coagulation</b><br>Platelets                                        | >150                   | ≤150       | ≤100               | ≤50                                             | ≤20                                               |              |
| <b>GI</b><br>T Bilirubin                                               | <1.2                   | 1.2-1.9    | 2.0-5.9            | 6.0-11.9                                        | □ 12                                              |              |
| <b>Cardio-<br/>Vascular</b>                                            | No<br>Hypo-<br>tension | MAP<br><70 | Dopa ≤5<br>PE <100 | Dopa > 5<br>Epi ≤ 0.1<br>NE ≤ 0.1<br>PE 100-300 | Dopa>15<br>Epi>0.1<br>NE>0.1<br>PE>300<br>VP>0.01 |              |
| <b>Neuro</b><br>GCS                                                    | 15                     | 13-14      | 10-12              | 6-9                                             | <6                                                |              |
| <b>Serum<br/>Creatinine</b><br><br>-OR-<br><br><b>Urine<br/>Output</b> | <1.2                   | 1.2-1.9    | 2.0-3.4            | 3.5-4.9<br><br><500cc/<br>day                   | □ 5.0<br><br><200cc/<br>day                       |              |
|                                                                        |                        |            |                    |                                                 |                                                   | <b>Total</b> |

018  
019  
020  
021  
022  
023  
024  
025

1. For patients on supplemental oxygen, add 0.03 to the room air FiO<sub>2</sub> (0.21) for each liter of nasal cannula oxygen (e.g. 2 liters = FiO<sub>2</sub> of 0.27). Face mask FiO<sub>2</sub> is whatever amount is being delivered (e.g. 40% face mask = FiO<sub>2</sub> of 0.40). For non-rebreather face masks, use FiO<sub>2</sub> of 0.99.
2. Doses of dopamine (Dopa), epinephrine (Epi), norepinephrine (NE) are in micrograms/kg/min; phenylephrine (PE) is micrograms/min; vasopressin (VP) is U/min. Vasopressors must have been administered for at least one hour.

026  
027

## APPENDIX H: P/F from S/F Calculator

Table from Ellis Equation  
Sanz et al. Respir 2015  
Ellis RK. JAP 1989

|       |   |       |       |       |       |       |       |       |       |       |       |       |       |        |        |        |        |        |        |        |
|-------|---|-------|-------|-------|-------|-------|-------|-------|-------|-------|-------|-------|-------|--------|--------|--------|--------|--------|--------|--------|
| 1/3   | A | 27300 | 35100 | 46800 | 49879 | 53300 | 57124 | 61425 | 66300 | 71871 | 78300 | 85800 | 94664 | 105300 | 118300 | 134550 | 155443 | 183300 | 222300 | 280800 |
| 0.333 | B | 27302 | 35102 | 46801 | 49880 | 53301 | 57125 | 61426 | 66301 | 71872 | 78301 | 85801 | 94664 | 105301 | 118301 | 134550 | 155443 | 183300 | 222300 | 280800 |

|      |      | SpO2 |      |     |      |      |      |      |      |      |      |      |      |     |      |      |      |      |      |      |
|------|------|------|------|-----|------|------|------|------|------|------|------|------|------|-----|------|------|------|------|------|------|
|      |      | 0.7  | 0.75 | 0.8 | 0.81 | 0.82 | 0.83 | 0.84 | 0.85 | 0.86 | 0.87 | 0.88 | 0.89 | 0.9 | 0.91 | 0.92 | 0.93 | 0.94 | 0.95 | 0.96 |
| FiO2 | 0.21 | 174  | 191  | 211 | 216  | 221  | 226  | 232  | 238  | 245  | 252  | 260  | 269  | 279 | 291  | 304  | 319  | 337  | 360  | 390  |
|      | 0.24 | 153  | 167  | 185 | 189  | 193  | 198  | 203  | 208  | 214  | 221  | 228  | 236  | 244 | 254  | 266  | 279  | 295  | 315  | 341  |
|      | 0.27 | 136  | 148  | 164 | 168  | 172  | 176  | 180  | 185  | 190  | 196  | 202  | 209  | 217 | 226  | 236  | 248  | 262  | 280  | 303  |
|      | 0.3  | 122  | 133  | 148 | 151  | 155  | 158  | 162  | 167  | 171  | 177  | 182  | 189  | 196 | 203  | 213  | 223  | 236  | 252  | 273  |
|      | 0.35 | 105  | 114  | 127 | 129  | 132  | 136  | 139  | 143  | 147  | 151  | 156  | 162  | 168 | 174  | 182  | 191  | 202  | 216  | 234  |
|      | 0.4  | 92   | 100  | 111 | 113  | 116  | 119  | 122  | 125  | 129  | 132  | 137  | 141  | 147 | 153  | 159  | 168  | 177  | 189  | 205  |
|      | 0.45 | 81   | 89   | 98  | 101  | 103  | 106  | 108  | 111  | 114  | 118  | 121  | 126  | 130 | 136  | 142  | 149  | 157  | 168  | 182  |
|      | 0.5  | 73   | 80   | 89  | 91   | 93   | 95   | 97   | 100  | 103  | 106  | 109  | 113  | 117 | 122  | 128  | 134  | 142  | 151  | 164  |
|      | 0.55 | 67   | 73   | 81  | 82   | 84   | 86   | 89   | 91   | 94   | 96   | 99   | 103  | 107 | 111  | 116  | 122  | 129  | 138  | 149  |
|      | 0.6  | 61   | 67   | 74  | 76   | 77   | 79   | 81   | 83   | 86   | 88   | 91   | 94   | 98  | 102  | 106  | 112  | 118  | 126  | 136  |
|      | 0.65 | 56   | 62   | 68  | 70   | 71   | 73   | 75   | 77   | 79   | 81   | 84   | 87   | 90  | 94   | 98   | 103  | 109  | 116  | 126  |
|      | 0.7  | 52   | 57   | 63  | 65   | 66   | 68   | 70   | 71   | 73   | 76   | 78   | 81   | 84  | 87   | 91   | 96   | 101  | 108  | 117  |
|      | 0.75 | 49   | 53   | 59  | 60   | 62   | 63   | 65   | 67   | 69   | 71   | 73   | 75   | 78  | 81   | 85   | 89   | 94   | 101  | 109  |
|      | 0.8  | 46   | 50   | 55  | 57   | 58   | 59   | 61   | 63   | 64   | 66   | 68   | 71   | 73  | 76   | 80   | 84   | 89   | 95   | 102  |
|      | 0.85 | 43   | 47   | 52  | 53   | 55   | 56   | 57   | 59   | 61   | 62   | 64   | 67   | 69  | 72   | 75   | 79   | 83   | 89   | 96   |
| 0.9  | 41   | 44   | 49   | 50  | 52   | 53   | 54   | 56   | 57   | 59   | 61   | 63   | 65   | 68  | 71   | 74   | 79   | 84   | 91   |      |
| 0.95 | 39   | 42   | 47   | 48  | 49   | 50   | 51   | 53   | 54   | 56   | 58   | 60   | 62   | 64  | 67   | 71   | 75   | 80   | 86   |      |
| 1    | 37   | 40   | 44   | 45  | 46   | 47   | 49   | 50   | 51   | 53   | 55   | 57   | 59   | 61  | 64   | 67   | 71   | 76   | 82   |      |

028

029

To calculate FiO2 for a non-intubated patient:

$$.21 + (3.5 \times \text{per liter O}_2) = \text{FiO}_2$$

032

Calculate PO2/FiO2 by finding SpO2 along the top row and calculated FiO2 along the left vertical axis and finding the intersection of the two.

033

034

**SpO2/FiO2 ratio should only be analyzed if the SpO2 is < 97%. At values of 97% or greater there is no longer an interpretable relationship between SpO2/FiO2 and PaO2/FiO2**

038

- <sup>1</sup> Bone RC, Balk RA, Cerra FB, et al, and members of the ACCP/SCCM Consensus Conference: Definitiona for sepsis and organ failure and guidelines for the use of innovative therapies in sepsis. *Chest* 1992;101:1644-1655 and *Crit Care Med* 1992;20:846-874.
- <sup>2</sup> Levy MM, Fink MP, Marshall JC, et al: 2001 SCCM/ESICM/ACCP/ATS/SIS International Sepsis Definitions Conference. *Crit Care Med* 2003;31:1250-1256.
- <sup>3</sup> Dellinger RP, Levy MM, Carlet JM, et al. Surviving Sepsis Campaign: International guidelines for management of severe sepsis and septic shock: 2008 [published correction appears in *Crit Care Med* 2008;36:1394-1396. *Crit Care Med* 2008;36:296-327.
- <sup>4</sup> Dombrovskiy, V. Y.; Martin, A. A.; Sunderram, J.; Paz, H. L. Rapid increase in hospitalization and mortality rates for severe sepsis in the United States: a trend analysis from 1993 to 2003. *Crit. Care Med.* 35:1244–1250; 2007.
- <sup>5</sup> Martin GS, Mannino DM, Eaton S, Moss M. The epidemiology of sepsis in the United States from 1979 through 2000. *N Engl J Med* 2003; 348:1546–1554.
- <sup>6</sup> Repine JE. Scientific perspectives on adult respiratory distress syndrome. *Lancet* 1992;339:466–469.
- <sup>7</sup> Baetz D, Shaw J, Kirshenbaum LA. Nuclear factor-kB decoys suppress endotoxin-induced lung injury. *Mol Pharmacol* 2005;67:977–979.
- <sup>8</sup> Nishikimi, M., Fukuyama, R., Minoshima, S., Shimizu, N., and Yagi, K. Cloning and chromosomal mapping of the human nonfunctional gene for L-gulonono-gamma-lactone oxidase, the enzyme for L-ascorbic acid biosynthesis missing in man. (1994) *J. Biol. Chem.* 269, 13685-8.
- <sup>9</sup> Vera JC, Rivas CI, Fischbarg J, and Golde DW. Mammalian facilitative hexose transporters mediate the transport of dehydroascorbic acid. (1993) *Nature* 364, 79-82.
- <sup>10</sup> Vera JC, Rivas CI, Velasquez FV, Zhang RH, Concha II, and Golde DW. Resolution of the facilitated transport of dehydroascorbic acid from its intracellular accumulation as ascorbic acid. (1995) *J. Biol. Chem.* 270, 23706-12.
- <sup>11</sup> Levine M, Wang Y, Padayatty SJ, and Morrow J. A new recommended dietary allowance of vitamin C for healthy young women. (2001) *Proc. Nat. Acad. Sci. U.S.A.* 98, 9842-6.
- <sup>12</sup> Wilson JX. Mechanism of action of vitamin C in sepsis: ascorbate modulates redox signaling in endothelium. *Biofactors.* 2009 Jan-Feb;35(1):5-13.
- <sup>13</sup> Borrelli E, Roux-Lombard P, Grau GE, Girardin E, Ricou B, Dayer J, Suter PM. Plasma concentrations of cytokines, their soluble receptors, and antioxidant vitamins can predict the development of multiple organ failure in patients at risk. *Crit. Care Med* 1996;24:392–397. [PubMed: 8625625]
- <sup>14</sup> Galley HF, Davies MJ, Webster NR. Ascorbyl radical formation in patients with sepsis: effect of ascorbate loading. *Free Radic. Biol. Med* 1996;20:139–143. [PubMed: 8903690]
- <sup>15</sup> Wilson, J.X.: Regulation of vitamin C transport. *Annu. Rev. Nutr.*, 25, 105–125, 2005.
- <sup>16</sup> Guaiquil, V. H., J. C. Vera, and D. W. Golde. 2001. Mechanism of vitamin C inhibition of cell death induced by oxidative stress in glutathione-depleted HL-60 cells. *J. Biol. Chem.* 276:40955–40961.
- <sup>17</sup> Lutsenko, E. A., J. M. Carcamo, and D. W. Golde. 2002. Vitamin C prevents DNA mutation induced by oxidative stress. *J. Biol. Chem.* 277:16895– 16899. (Erratum, 277:27576.)
- <sup>18</sup> Levine, M., K. Morita, E. Heldman, and H. B. Pollard. 1985. Ascorbic acid regulation of norepinephrine biosynthesis in isolated chromaffin granules from bovine adrenal medulla. *J. Biol. Chem.* 260:15598–15603.
- <sup>19</sup> Padh, H. 1991. Vitamin C: newer insights into its biochemical functions. *Nutr. Rev.* 49:65–70.
- <sup>20</sup> Rebouche, C. J. 1991. Ascorbic acid and carnitine biosynthesis. *Am. J. Clin. Nutr.* 54:1147S–1152S.
- <sup>21</sup> Armour J, Tyml K, Lidington D, Wilson JX. Ascorbate prevents microvascular dysfunction in the skeletal muscle of the septic rat. *J. Appl. Physiol* 2001;90:795–803. [PubMed: 11181585]
- <sup>22</sup> Kim JY, Lee SM. Vitamins C and E protect hepatic cytochrome P450 dysfunction induced by polymicrobial sepsis. *Eur. J. Pharmacol* 2006;534:202–209. [PubMed: 16483564]
- <sup>23</sup> Tyml K, Li F, Wilson JX. Septic impairment of capillary blood flow requires nicotinamide adenine dinucleotide phosphate oxidase but not nitric oxide synthase and is rapidly reversed by ascorbate through an endothelial nitric oxide synthase-dependent mechanism. *Crit. Care Med* 2008;36:2355– 2362. [PubMed: 18596627]
- <sup>24</sup> Gaut JP, Belaouaj A, Byun J, Roberts LJ II, Maeda N, Frei B, Heinecke JW. Vitamin C fails to protect amino acids and lipids from oxidation during acute inflammation. *Free Radic. Biol. Med* 2006;40:1494–1501. [PubMed: 16632110]

- <sup>25</sup> Vissers MC, Gunningham SP, Morrison MJ, Dachs GU, Currie MJ. Modulation of hypoxia-inducible factor-1 alpha in cultured primary cells by intracellular ascorbate. *Free Radic Biol Med* 2007;42:765-772.
- <sup>26</sup> Cepinskas G, Wilson JX. Inflammatory response in microvascular endothelium in sepsis: role of oxidants. *J Clin Biochem Nutr.* 2008 May;42(3):175-84.
- <sup>27</sup> Matthay MA, Zimmerman GA, Esmon C, Bhattacharya J, Collier B, Doerschuk CM, Floros J, Gimbrone MA Jr, Hoffman E, Hubmayr RD, et al. Future research directions in acute lung injury: summary of a National Heart, Lung, and Blood Institute working group. *Am J Respir Crit Care Med* 2003;167:1027–1035.
- <sup>28</sup> Kabir K, Gelinas JP, Chen M, Chen D, Zhang D, Luo X, Yang JH, Carter D, Rabinovici R. Characterization of a murine model of endotoxin-induced acute lung injury. *Shock* 2002;17:300–303.
- <sup>29</sup> Cohen, J.: The immunopathogenesis of sepsis. *Nature*, 420, 885–891, 2002.
- <sup>30</sup> Abraham, E. and Singer, M.: Mechanisms of sepsis-induced organ dysfunction. *Crit. Care Med.*, 35, 2408–2416, 2007.
- <sup>31</sup> Abraham, E.: Nuclear factor-kappaB and its role in sepsis-associated organ failure. *J. Infect Dis.*, 187 Suppl. 2, S364–369, 2003.
- <sup>32</sup> Rao, R.M., Yang, L., Garcia-Cardena, G., and Luscinskas, F.W.: Endothelial-dependent mechanisms of leukocyte recruitment to the vascular wall. *Circ. Res.*, 101, 234–247, 2007.
- <sup>33</sup> Bernard, G.R., Vincent, J.L., Laterre, P.F., LaRosa, S.P., Dhainaut, J.F., Lopez-Rodriguez, A., Steingrub, J.S., Garber, G.E., Helterbrand, J.D., Ely, E.W., and Fisher, C.J., Jr.: Efficacy and safety of recombinant human activated protein C for severe sepsis. *N. Engl. J. Med.*, 344, 699–709, 2001.
- <sup>34</sup> Panacek, E.A., Marshall, J.C., Albertson, T.E., Johnson, D.H., Johnson, S., MacArthur, R.D., Miller, M., Barchuk, W.T., Fischkoff, S., Kaul, M., Teoh, L., Van Meter, L., Daum, L., Lemeshow, S., Hicklin, G., and Doig, C.: Efficacy and safety of the monoclonal anti-tumor necrosis factor antibody F(ab')<sub>2</sub> fragment afelimomab in patients with severe sepsis and elevated interleukin-6 levels. *Crit. Care Med.*, 32, 2173–2182, 2004.
- <sup>35</sup> Erickson SE, Martin GS, Davis JL, Matthay MA, Eisner MD. Recent trends in acute lung injury mortality: 1996-2005. *Crit Care Med* 2009; 37: 1574-1579.
- <sup>36</sup> Nathens AB, Neff MJ, Jurkovich GJ, Koltz P, Farver K, Ruzinski JT, Radella F, Garcia I, Maier RV. Randomized, prospective trial of antioxidant supplementation in critically ill surgical patients. *Ann Surg*; 236:814-822, 2002.
- <sup>37</sup> Muhlhofer A, Mrosek S, Schlegel B, Trommer W, Rozario F, Bohles H, Schremmer D, Zoller WG, Biesalski HK. High-dose intravenous vitamin C is not associated with an increase of pro-oxidative biomarkers. *Euro Journ Clin Nutrition* 58:1151-1158, 2004.
- <sup>38</sup> Tanaka H, Matsuda T, Miyagantani Y, Yukioka T, Matsuda H, Shimazaki S. Reduction in resuscitation fluid volumes in severely burned patients using ascorbic acid administration, *Arch Surg* 135:326-331, 2000.
- <sup>39</sup> Gando S, Kameue T, Nanzaki S, Nakanishi Y. Disseminated Intravascular coagulation is a frequent complication of systemic inflammatory response syndrome. *Thromb Haemost* 75: 224-228, 1996.
- <sup>40</sup> Bastarache JA, Wang L, Wang Z, Albertine KH, Matthay MA, Ware LB. Intra-alveolar tissue factor pathway inhibitor is not sufficient to block tissue factor procoagulant activity. *Am J Physiol Lung Cell Mol Physiol* 294: L874-881, 2008.
- <sup>41</sup> Ferreira FL, Bota DP, Bross A, Mélot C, Vincent JL. Serial evaluation of the SOFA score to predict outcome in critically ill patients. *JAMA.* 2001 Oct 10;286(14):1754-8.
- <sup>42</sup> Nishikimi M, Kukuyama r, Minoshima S, Shimizu N, Yagi K. Cloning and chromosomal mapping of the human nonfunctional gene for L-gulonogamma-lactone oxidase, the enzyme for L-ascorbic acid biosynthesis missing in man. *J Biol Chem.* 1994;269:13685-88.
- <sup>43</sup> Vera JC, Rivas CI, Fischbarg j, Golde DW. Mammalian facilitative hexose transporters mediate the transport of dehydroascorbic acid. *Nature.* 1993;364:79-82.
- <sup>44</sup> Levine M, Wang Y, Padayatty SJ, Morrow J. A new recommended dietary allowance of vitamin C for healthy young women. *Proc Nat Acad Sci USA.* 2001;98:9842-46.
- <sup>45</sup> Galley HF, Davies MJ, Webster NR. Ascorbyl radical formation in patients with sepsis: effect of ascorbate loading. *Free Rad Biol Med* 1996;20(1):139-143.
- <sup>46</sup> Baines M, Shenkin A. Lack of effectiveness of short-term intravenous micronutrient nutrition in restoring plasma antioxidant status after surgery. *Clin Nutr.* 2002;21(2):145-50.
- <sup>47</sup> Wu F, Wilson JX, Tyml K. Ascorbate inhibits iNOS expression and preserves vasoconstrictor responsiveness in skeletal muscle of septic mice. *Am J Physiol Regul Integr Comp Physiol.* 2003;285:R50-56.

- <sup>48</sup> Armour J, Tyml K, Lidington D, Wilson JX. Ascorbate prevents microvascular dysfunction in the skeletal muscle in the septic rat. *J Appl Physiol* 2001;90:795-803.
- <sup>49</sup> Han M, Pendem S, The SL, Sukumaran DK, Wu F, Wilson JX. Ascorbate protects endothelial barrier function during septic insult: Role of protein phosphatase type 2A. *Free Radic Biol Med*. 2010;48(1):128-35.
- <sup>50</sup> Kirsch M, de Groot H. Ascorbate is a potent antioxidant against peroxynitrite-induced oxidation reactions. Evidence that ascorbate acts by re-reducing substrate radicals produced by peroxynitrite. *J Biol Chem* 2000;275:16702-708.
- <sup>51</sup> Padayatty SJ, Sun H, Wang Y, Riordan HD, Hewitt SM, Katz A, Wesley RA, Levine M. Vitamin C pharmacokinetics: Implications for oral and intravenous use. *Ann Intern Med*. 2004;140:533-537.
- <sup>52</sup> Jabour ER, Rabil DM, Truweit JD, Rochester DF. Evaluation of a new weaning index based on ventilatory endurance and the efficiency of gas exchange. *Am Rev Respir Dis*. 1991 Sep;144(3 Pt 1):531-7.
- <sup>53</sup> Ventilation with lower tidal volumes as compared with traditional tidal volumes for acute lung injury and the acute respiratory distress syndrome. The Acute Respiratory Distress Syndrome Network. *N Engl J Med* 2000; 342:1301-1308
- <sup>54</sup> Wiedemann HP, Wheeler AP, Bernard GR, et al. Comparison of two fluid-management strategies in acute lung injury. *N Engl J Med* 2006; 354:2564-2575
- <sup>55</sup> Searle SR. Mixed Liner Models. *Biometrics*. 1971;27(1):15.
- <sup>56</sup> Wolfinger R, O'Connell M. Generalized linear mixed models a pseudo-likelihood approach *J Stat Comp Sim*. 1993;48(3):233-43.
- <sup>57</sup> Little RJA. A test of missing completely at random for multivariate data with missing values. *J Amer Stat Assn*. 1998;83:1198.
- <sup>58</sup> Mühlhölfer A, Mrosek S, Schlegel B, Trommer W, Rozario F, Böhles H, Schremmer D, Zoller WG, Biesalski HK. High-dose intravenous vitamin C is not associated with an increase of pro-oxidative biomarkers. *Eur J Clin Nutr*. 2004 Aug;58(8):1151-8.
- <sup>59</sup> Nathens AB, Neff MJ, Jurkovich GJ, Klotz P, Farver K, Ruzinski JT, Radella F, Garcia I, Maier RV. Randomized, prospective trial of antioxidant supplementation in critically ill surgical patients. *Ann Surg*. 2002;236(6):814-22.
- <sup>60</sup> Hoffer LJ, Levine M, Assouline S, Melnychuk D, Padayatty SJ, Rosadiuk K, Rousseau C, Robitaille L, Miller WH Jr. Phase I clinical trial of i.v. ascorbic acid in advanced malignancy. *Ann Oncol*. 2008 Nov;19(11):1969-74.
- <sup>61</sup> Biesalski, H. K. (2008). Parenteral ascorbic acid in haemodialysis patients. *Current Opinion in Clinical Nutrition and Metabolic Care*, (11), 741-746.
- <sup>62</sup> National Bioethics Advisory Committee (NBAC). Research Involving Persons with Mental Disorders That May Affect Decision making Capacity. Rockville: U.S. Government Printing Office, 1998
- <sup>63</sup> Office of Human Research Protections (OHRP). Compliance Determination Letters, 2002
- <sup>64</sup> Dresser R. Research Involving Persons with Mental Disabilities: A Review of Policy Issues and Proposals. National Bioethics Advisory Commission. Rockville: U.S. Government Printing Office, 1999; 5-28
- <sup>65</sup> American College of Physicians. Cognitively Impaired Subjects. *Ann Int Med* 1989; 111:843-848
- <sup>66</sup> Jonas E, Dwenger A, Hager A. In vitro effect of ascorbic acid on neutrophil-endothelial cell interaction. *J Biolumin Chemilumin*. 1993;8(1):15-20.
- <sup>67</sup> Parker A, Cuddihy SL, Son TG, Vissers MC, Winterbourn CC. Roles of superoxide and myeloperoxidase in ascorbate oxidation in stimulated neutrophils and H<sub>2</sub>O<sub>2</sub>-treated HL60 cells. *Free Radic Biol Med*. 2011;51(7):1399-405.
- <sup>68</sup> Loke WM, Proudfoot JM, McKinley AJ, Croft KD. Augmentation of monocyte intracellular ascorbate in vitro protects cells from oxidative damage and inflammatory responses. *Biochem Biophys Res Commun*. 2006;345(3):1039-43.
- <sup>69</sup> Pan JP, Cheng TM, Chou SC, Lai ST Vitamin C protects against lysophosphatidylcholine-induced expression of monocyte chemoattractant protein-1 in cultured human umbilical vein endothelial cells. *Formos Med Assoc*. 2003;102(3):151-7.
- <sup>70</sup> Raghavan SA, Sharma P, Dikshit M. Role of ascorbic acid in the modulation of inhibition of platelet aggregation by polymorphonuclear leukocytes. *Thromb Res*. 2003 May 1;110(2-3):117-26.
- <sup>71</sup> Pignatelli P, Sanguigni V, Paola SG, Lo Coco E, Lenti L, Violi F. Vitamin C inhibits platelet expression of CD40 ligand. *Free Radic Biol Med*. 2005 Jun 15;38(12):1662-6.
- <sup>72</sup> Wu F, Schuster DP, Tyml K, Wilson JX. Ascorbate inhibits NADPH oxidase subunit p47phox expression in microvascular endothelial cells. *Free Radic Biol Med*. 2007 Jan 1;42(1):124-31.

<sup>73</sup> Woo A, Kim JH, Jeong YJ, Maeng HG, Lee YT, Kang JS, Lee WJ, Hwang YI. Vitamin C acts indirectly to modulate isotype switching in mouse B cells. *Anat Cell Biol.* 2010;43(1):25-35.

<sup>74</sup> Härtel C, Strunk T, Bucsky P, Schultz C. Effects of vitamin C on intracytoplasmic cytokine production in human whole blood monocytes and lymphocytes. *Cytokine.* 2000;27(4-5):101-6

Härtel C, Strunk T, Bucsky P, Schultz C.

<sup>75</sup> Muellner MK, Schreier SM, Schmidbauer B, Moser M, Quehenberger P, Kapiotis S, Goldenberg H, Laggner H. Vitamin C inhibits NO-induced stabilization of HIF-1alpha in HUVECs. *Free Radic Res.* 2010;44(7):783-91.

<sup>76</sup> Qiao H, Li L, Qu ZC, May JM Cobalt-induced oxidant stress in cultured endothelial cells: prevention by ascorbate in relation to HIF-1alpha. *Biofactors.* 2009;35(3):306-13.

<sup>77</sup> Fisher BJ, Seropian IM, Kraskauskas D, Thakkar JN, Voelkel NF, Fowler AA 3rd, Natarajan R. Ascorbic acid attenuates Crit Care Med. 2011 Jun;39(6):1454-60.

<sup>78</sup> Zhou G, Kamenos GC, Pendem S, Wilson JX, Wu F. Ascorbate protects against vascular leakage in cecal ligation and puncture-induced septic peritonitis. *Am J Physiol Regul Integr Comp Physiol.* 2011.

<sup>79</sup> Tysl K, Li F, Wilson JX. Septic impairment of capillary blood flow requires nicotinamide adenine dinucleotide phosphate oxidase but not nitric oxide synthase and is rapidly reversed by ascorbate through an endothelial nitric oxide synthase-dependent mechanism. *Crit Care Med.* 2008;36(8):2355-62.

<sup>80</sup> Wu F, Wilson JX, Tysl K Ascorbate inhibits iNOS expression and preserves vasoconstrictor responsiveness in skeletal muscle of septic mice. *Am J Physiol Regul Integr Comp Physiol.* 2003;285(1):R50-6.

<sup>81</sup> Wu F, Tysl K, Wilson JX. Ascorbate inhibits iNOS expression in endotoxin- and IFN gamma-stimulated rat skeletal muscle endothelial cells. *FEBS Lett.* 2002;520(3):122-6.

<sup>82</sup> Park JK, Ki MR, Lee HR, Hong IH, Ji AR, Ishigami A, Park SI, Kim JM, Chung HY, Yoo SE, Jeong KS. Vitamin C deficiency attenuates liver fibrosis by way of up-regulated peroxisome proliferator-activated receptor-gamma expression in senescence marker protein 30 knockout mice. *Hepatology.* 2010;51(5):1766-77.

<sup>83</sup> Stirrat A, Nelli S, Dowell FJ, Martin W. Flow-induced enhancement of vasoconstriction and blockade of endothelium-derived hyperpolarizing factor (EDHF) by ascorbate in the rat mesentery. *Br J Pharmacol.* 2008;153(6):1162-8.

<sup>84</sup> Stirrat A, Nelli S, McGuckin A, Ho VW, Wilson WS, Martin W. Ascorbate elevates perfusion pressure in the bovine extraocular long posterior ciliary artery: role of endothelium-derived hyperpolarizing factor (EDHF). *Br J Pharmacol.* 2006;534(1-3):152-8.

<sup>85</sup> Rivas CI, Zúñiga FA, Salas-Burgos A, Mardones L, Ormazabal V, Vera JC. Vitamin C transporters. *J Physiol Biochem.* 2008;64(4):357-75.

<sup>86</sup> Hu S, Che JW, DU Y, Bao CM. [Observation on the effect of vitamin C in alleviating peroxidative damage in gut of dogs during enteral fluid resuscitation of severe burn shock]. *Zhonghua Shao Shang Za Zhi.* 2009;25(6):451-3.

<sup>87</sup> Hamilton GJ, Van PY, Differding JA, Kremenevskiy IV, Spoerke NJ, Sambasivan C, Watters JM, Schreiber MA. Lyophilized plasma with ascorbic acid decreases inflammation in hemorrhagic shock. *J Trauma.* 2011;71(2):292-7; discussion 297-8.

<sup>88</sup> Li SH, Ryu JH, Park SE, Cho YS, Park JW, Lee WJ, Chun YS Vitamin C supplementation prevents testosterone-induced hyperplasia of rat prostate by down-regulating HIF-1alpha. *J Nutr Biochem.* 2010;21(9):801-8.

<sup>89</sup> Buehler PW, D'Agnillo F, Hoffman V, Alayash AI. Effects of endogenous ascorbate on oxidation, oxygenation, and toxicokinetics of cell-free modified hemoglobin after exchange transfusion in rat and guinea pig. *J Pharmacol Exp Ther.* 2007;323(1):49-60.

<sup>90</sup> Buehler PW, D'Agnillo F, Hoffman V, Alayash AI. Effects of endogenous ascorbate on oxidation, oxygenation, and toxicokinetics of cell-free modified hemoglobin after exchange transfusion in rat and guinea pig. *J Pharmacol Exp Ther.* 2007;323(1):49-60..

<sup>91</sup> Woollard KJ, Loryman CJ, Meredith E, Bevan R, Shaw JA, Lunec J, Griffiths HR. Effects of oral vitamin C on monocyte: endothelial cell adhesion in healthy subjects. *Biochem Biophys Res Commun.* 2002 Jun 28;294(5):1161-8.

<sup>92</sup> Tarng DC, Liu TY, Huang TP. Protective effect of vitamin C on 8-hydroxy-2'-deoxyguanosine level in peripheral blood lymphocytes of chronic hemodialysis patients. *Kidney Int.* 2004 Aug;66(2):820-31.



- 
- <sup>93</sup> Crecelius AR, Kirby BS, Voyles WF, Dinunno FA. Nitric oxide, but not vasodilating prostaglandins, contributes to the improvement of exercise hyperemia via ascorbic acid in healthy older adults. *Am J Physiol Heart Circ Physiol*. 2010;299(5):H1633-41.
- <sup>94</sup> Basili S, Tanzilli G, Mangieri E, Raparelli V, Di Santo S, Pignatelli P, Violi F. Intravenous ascorbic acid infusion improves myocardial perfusion grade during elective percutaneous coronary intervention: relationship with oxidative stress markers. *JACC Cardiovasc Interv*. 2010;3(2):221-9.
- <sup>95</sup> Zhang K, Liu L, Cheng X, Dong J, Geng Q, Zuo L. Low levels of vitamin C in dialysis patients is associated with decreased prealbumin and increased C-reactive protein. *BMC Nephrol*. 2011;12:18.
- <sup>96</sup> Kubota Y, Moriyama Y, Yamagishi K, Tanigawa T, Noda H, Yokota K, Harada M, Inagawa M, Oshima M, Sato S, Iso H. Serum vitamin C concentration and hs-CRP level in middle-aged Japanese men and women. *Atherosclerosis*. 2010;208(2):496-500.
- <sup>97</sup> Mah E, Matos MD, Kawiecki D, Ballard K, Guo Y, Volek JS, Bruno RS. Vitamin C status is related to proinflammatory responses and impaired vascular endothelial function in healthy, college-aged lean and obese men. *J Am Diet Assoc*. 2011;111(5):737-43.
- <sup>98</sup> Castillo R, Rodrigo R, Perez F, Cereceda M, Asenjo R, Zamorano J, Navarrete R, Villalabeitia E, Sanz J, Baeza C, Aguayo R. Antioxidant therapy reduces oxidative and inflammatory tissue damage in patients subjected to cardiac surgery with extracorporeal circulation. *Basic Clin Pharmacol Toxicol*. 2011;108(4):256-62.
- <sup>99</sup> Finkelstein FO, Juergensen P, Wang S, Santacroce S, Levine M, Kotanko P, Levin NW, Handelman GJ. Hemoglobin and plasma vitamin C levels in patients on peritoneal dialysis. *Perit Dial Int*. 2011;31(1):74-9.
- <sup>100</sup> Nathens AB, Neff MJ, Jurkovich GJ, Klotz P, Farver K, Ruzinski JT, Radella F, Garcia I, Maier RV. Randomized, prospective trial of antioxidant supplementation in critically ill surgical patients. *Ann Surg*. 2002;236(6):814-22.
- <sup>101</sup> The Acute Respiratory Distress Syndrome Network. Ventilation with lower tidal volumes as compared with traditional tidal volumes for acute lung injury and the acute respiratory distress syndrome. *The Acute Respiratory Distress Syndrome Network*. 2000; 342:1301-1308
- <sup>102</sup> Brower RG, Lanken PN, MacIntyre N, et al. Higher versus lower positive end-expiratory pressures in patients with the acute respiratory distress syndrome. *N Engl J Med* 2004; 351:327-336
