# Supplementary material
Source: PubMed Central journal article supplement (PMC6777268)
Supplement: jama-322-1261-s003.pdf [file jama-322-1261-s003.pdf]

## Data Sharing Statement

Fowler, III. Effect of Vitamin C Infusion on Organ Failure and Biomarkers of Inflammation and Vascular Injury in Patients With Sepsis and Severe Acute Respiratory Failure. *JAMA*. Published October 01, 2019. 10.1001/jama.2019.11825

### Data

**Data available:** Yes

**Data types:** Deidentified participant data

**How to access data:** <https://clinicaltrials.gov/ct2/show/NCT02106975>

**When available:** With publication

### Supporting Documents

**Document types:** None

### Additional Information

**Who can access the data:** Data will be made available upon reasonable request by researchers who provide a methodologically sound proposal and whose use of the data has been approved the study authors.

**Types of analyses:** For any purpose

**Mechanisms of data availability:** De-identified individual participant data collected during the trial will be made available upon reasonable request.
